# Supplementary material for: Comprehensive analysis of ubiquitin-proteasome system genes related to prognosis and immunosuppression in head and neck squamous cell carcinoma
Source: Aging (Albany NY). 2021 Aug 16;13(16):20277–301. doi: 10.18632/aging.203411 (PMC8436932; doi:10.18632/aging.203411)
Supplement: Supplementary Table 1 [file aging-13-203411-s002.xlsx]

## Sheet: ST1-UPS genes
Supplementary Table 1. List of ubiquitin proteasome system (UPS)-related genes analyzed in this study.
Gene-ID	Gene-Symbol	Name	Species
E1s
7317	UBA1	ubiquitin like modifier activating enzyme 1(UBA1)	Homo sapiens
10054	UBA2	ubiquitin like modifier activating enzyme 2(UBA2)	Homo sapiens
9039	UBA3	ubiquitin like modifier activating enzyme 3(UBA3)	Homo sapiens
79876	UBA5	ubiquitin like modifier activating enzyme 5(UBA5)	Homo sapiens
55236	UBA6	ubiquitin like modifier activating enzyme 6(UBA6)	Homo sapiens
7318	UBA7	ubiquitin like modifier activating enzyme 7(UBA7)	Homo sapiens
10533	ATG7	autophagy related 7(ATG7)	Homo sapiens
27304	MOCS3	molybdenum cofactor synthesis 3(MOCS3)	Homo sapiens
8883	NAE1	NEDD8 activating enzyme E1 subunit 1(NAE1)	Homo sapiens
10055	SAE1	SUMO1 activating enzyme subunit 1(SAE1)	Homo sapiens
E2s
7319	UBE2A	ubiquitin conjugating enzyme E2 A(UBE2A)	Homo sapiens
7320	UBE2B	ubiquitin conjugating enzyme E2 B(UBE2B)	Homo sapiens
11065	UBE2C	ubiquitin conjugating enzyme E2 C(UBE2C)	Homo sapiens
7321	UBE2D1	ubiquitin conjugating enzyme E2 D1(UBE2D1)	Homo sapiens
7322	UBE2D2	ubiquitin conjugating enzyme E2 D2(UBE2D2)	Homo sapiens
7323	UBE2D3	ubiquitin conjugating enzyme E2 D3(UBE2D3)	Homo sapiens
51619	UBE2D4	ubiquitin conjugating enzyme E2 D4 (putative)(UBE2D4)	Homo sapiens
7324	UBE2E1	ubiquitin conjugating enzyme E2 E1(UBE2E1)	Homo sapiens
7325	UBE2E2	ubiquitin conjugating enzyme E2 E2(UBE2E2)	Homo sapiens
10477	UBE2E3	ubiquitin conjugating enzyme E2 E3(UBE2E3)	Homo sapiens
140739	UBE2F	ubiquitin conjugating enzyme E2 F (putative)(UBE2F)	Homo sapiens
7326	UBE2G1	ubiquitin conjugating enzyme E2 G1(UBE2G1)	Homo sapiens
7327	UBE2G2	ubiquitin conjugating enzyme E2 G2(UBE2G2)	Homo sapiens
7328	UBE2H	ubiquitin conjugating enzyme E2 H(UBE2H)	Homo sapiens
7329	UBE2I	ubiquitin conjugating enzyme E2 I(UBE2I)	Homo sapiens
51465	UBE2J1	ubiquitin conjugating enzyme E2 J1(UBE2J1)	Homo sapiens
118424	UBE2J2	ubiquitin conjugating enzyme E2 J2(UBE2J2)	Homo sapiens
3093	UBE2K	ubiquitin conjugating enzyme E2 K(UBE2K)	Homo sapiens
7332	UBE2L3	ubiquitin conjugating enzyme E2 L3(UBE2L3)	Homo sapiens
9246	UBE2L6	ubiquitin conjugating enzyme E2 L6(UBE2L6)	Homo sapiens
9040	UBE2M	ubiquitin conjugating enzyme E2 M(UBE2M)	Homo sapiens
7334	UBE2N	ubiquitin conjugating enzyme E2 N(UBE2N)	Homo sapiens
389898	UBE2NL	ubiquitin conjugating enzyme E2 N like (gene/pseudogene)(UBE2NL)	Homo sapiens
63893	UBE2O	ubiquitin conjugating enzyme E2 O(UBE2O)	Homo sapiens
55585	UBE2Q1	ubiquitin conjugating enzyme E2 Q1(UBE2Q1)	Homo sapiens
92912	UBE2Q2	ubiquitin conjugating enzyme E2 Q2(UBE2Q2)	Homo sapiens
134111	UBE2QL1	ubiquitin conjugating enzyme E2 Q family like 1(UBE2QL1)	Homo sapiens
54926	UBE2R2	ubiquitin conjugating enzyme E2 R2(UBE2R2)	Homo sapiens
27338	UBE2S	ubiquitin conjugating enzyme E2 S(UBE2S)	Homo sapiens
29089	UBE2T	ubiquitin conjugating enzyme E2 T(UBE2T)	Homo sapiens
148581	UBE2U	ubiquitin conjugating enzyme E2 U (putative)(UBE2U)	Homo sapiens
7335	UBE2V1	ubiquitin conjugating enzyme E2 V1(UBE2V1)	Homo sapiens
7336	UBE2V2	ubiquitin conjugating enzyme E2 V2(UBE2V2)	Homo sapiens
55284	UBE2W	ubiquitin conjugating enzyme E2 W (putative)(UBE2W)	Homo sapiens
65264	UBE2Z	ubiquitin conjugating enzyme E2 Z(UBE2Z)	Homo sapiens
83734	ATG10	autophagy related 10(ATG10)	Homo sapiens
64422	ATG3	autophagy related 3(ATG3)	Homo sapiens
57448	BIRC6	baculoviral IAP repeat containing 6(BIRC6)	Homo sapiens
997	CDC34	cell division cycle 34(CDC34)	Homo sapiens
E3s
80325	ABTB1	ankyrin repeat and BTB domain containing 1(ABTB1)	Homo sapiens
25841	ABTB2	ankyrin repeat and BTB domain containing 2(ABTB2)	Homo sapiens
267	AMFR	autocrine motility factor receptor(AMFR)	Homo sapiens
51529	ANAPC11	anaphase promoting complex subunit 11(ANAPC11)	Homo sapiens
51479	ANKFY1	ankyrin repeat and FYVE domain containing 1(ANKFY1)	Homo sapiens
54467	ANKIB1	ankyrin repeat and IBR domain containing 1(ANKIB1)	Homo sapiens
93550	ZFAND4 (ANUBL1)	zinc finger AN1-type containing 4 (ZFAND4)	Homo sapiens
25820	ARIH1	ariadne RBR E3 ubiquitin protein ligase 1(ARIH1)	Homo sapiens
10425	ARIH2	ariadne RBR E3 ubiquitin protein ligase 2(ARIH2)	Homo sapiens
79798	ARMC5	armadillo repeat containing 5(ARMC5)	Homo sapiens
136371	ASB10	ankyrin repeat and SOCS box containing 10(ASB10)	Homo sapiens
140456	ASB11	ankyrin repeat and SOCS box containing 11(ASB11)	Homo sapiens
79754	ASB13	ankyrin repeat and SOCS box containing 13(ASB13)	Homo sapiens
142686	ASB14	ankyrin repeat and SOCS box containing 14(ASB14)	Homo sapiens
142685	ASB15	ankyrin repeat and SOCS box containing 15(ASB15)	Homo sapiens
92591	ASB16	ankyrin repeat and SOCS box containing 16(ASB16)	Homo sapiens
127247	ASB17	ankyrin repeat and SOCS box containing 17(ASB17)	Homo sapiens
401036	ASB18	ankyrin repeat and SOCS box containing 18(ASB18)	Homo sapiens
51676	ASB2	ankyrin repeat and SOCS box containing 2(ASB2)	Homo sapiens
51130	ASB3	ankyrin repeat and SOCS box containing 3(ASB3)	Homo sapiens
51666	ASB4	ankyrin repeat and SOCS box containing 4(ASB4)	Homo sapiens
140458	ASB5	ankyrin repeat and SOCS box containing 5(ASB5)	Homo sapiens
140459	ASB6	ankyrin repeat and SOCS box containing 6(ASB6)	Homo sapiens
140460	ASB7	ankyrin repeat and SOCS box containing 7(ASB7)	Homo sapiens
140461	ASB8	ankyrin repeat and SOCS box containing 8(ASB8)	Homo sapiens
140462	ASB9	ankyrin repeat and SOCS box containing 9(ASB9)	Homo sapiens
546	ATRX	ATRX, chromatin remodeler(ATRX)	Homo sapiens
571	BACH1	BTB domain and CNC homolog 1(BACH1)	Homo sapiens
60468	BACH2	BTB domain and CNC homolog 2(BACH2)	Homo sapiens
580	BARD1	BRCA1 associated RING domain 1(BARD1)	Homo sapiens
604	BCL6	B-cell CLL/lymphoma 6(BCL6)	Homo sapiens
255877	BCL6B	B-cell CLL/lymphoma 6B(BCL6B)	Homo sapiens
51283	BFAR	bifunctional apoptosis regulator(BFAR)	Homo sapiens
329	BIRC2	baculoviral IAP repeat containing 2(BIRC2)	Homo sapiens
330	BIRC3	baculoviral IAP repeat containing 3(BIRC3)	Homo sapiens
79444	BIRC7	baculoviral IAP repeat containing 7(BIRC7)	Homo sapiens
112401	BIRC8	baculoviral IAP repeat containing 8(BIRC8)	Homo sapiens
648	BMI1	BMI1 proto-oncogene, polycomb ring finger(BMI1)	Homo sapiens
8315	BRAP	BRCA1 associated protein(BRAP)	Homo sapiens
672	BRCA1	BRCA1, DNA repair associated(BRCA1)	Homo sapiens
53339	BTBD1	BTB domain containing 1(BTBD1)	Homo sapiens
84280	BTBD10	BTB domain containing 10(BTBD10)	Homo sapiens
121551	BTBD11	BTB domain containing 11(BTBD11)	Homo sapiens
84464	SLX4 (BTBD12)	SLX4 structure-specific endonuclease subunit (SLX4)	Homo sapiens
388419	BTBD17	BTB domain containing 17(BTBD17)	Homo sapiens
55643	BTBD2	BTB domain containing 2(BTBD2)	Homo sapiens
22903	BTBD3	BTB domain containing 3(BTBD3)	Homo sapiens
90135	BTBD6	BTB domain containing 6(BTBD6)	Homo sapiens
55727	BTBD7	BTB domain containing 7(BTBD7)	Homo sapiens
284697	BTBD8	BTB domain containing 8(BTBD8)	Homo sapiens
114781	BTBD9	BTB domain containing 9(BTBD9)	Homo sapiens
8945	BTRC	beta-transducin repeat containing E3 ubiquitin protein ligase(BTRC)	Homo sapiens
283450	HECTD4 (C12orf51)	HECT domain E3 ubiquitin protein ligase 4(HECTD4)	Homo sapiens
64207	IRF2BPL (C14orf4)	interferon regulatory factor 2 binding protein like (IRF2BPL)	Homo sapiens
867	CBL	Cbl proto-oncogene(CBL)	Homo sapiens
868	CBLB	Cbl proto-oncogene B(CBLB)	Homo sapiens
23624	CBLC	Cbl proto-oncogene C(CBLC)	Homo sapiens
79872	CBLL1	Cbl proto-oncogene like 1(CBLL1)	Homo sapiens
881	CCIN	calicin(CCIN)	Homo sapiens
57820	CCNB1IP1	cyclin B1 interacting protein 1(CCNB1IP1)	Homo sapiens
899	CCNF	cyclin F(CCNF)	Homo sapiens
10668	CGRRF1	cell growth regulator with ring finger domain 1(CGRRF1)	Homo sapiens
55743	CHFR	checkpoint with forkhead and ring finger domains(CHFR)	Homo sapiens
1154	CISH	cytokine inducible SH2 containing protein(CISH)	Homo sapiens
4850	CNOT4	CCR4-NOT transcription complex subunit 4(CNOT4)	Homo sapiens
29894	CPSF1	cleavage and polyadenylation specific factor 1(CPSF1)	Homo sapiens
23113	CUL9	cullin 9(CUL9)	Homo sapiens
149095	DCST1	DC-STAMP domain containing 1(DCST1)	Homo sapiens
1642	DDB1	damage specific DNA binding protein 1(DDB1)	Homo sapiens
8193	DPF1	double PHD fingers 1(DPF1)	Homo sapiens
1840	DTX1	deltex E3 ubiquitin ligase 1(DTX1)	Homo sapiens
113878	DTX2	deltex E3 ubiquitin ligase 2(DTX2)	Homo sapiens
196403	DTX3	deltex E3 ubiquitin ligase 3(DTX3)	Homo sapiens
151636	DTX3L	deltex E3 ubiquitin ligase 3L(DTX3L)	Homo sapiens
23220	DTX4	deltex E3 ubiquitin ligase 4(DTX4)	Homo sapiens
9666	DZIP3	DAZ interacting zinc finger protein 3(DZIP3)	Homo sapiens
345930	ECT2L	epithelial cell transforming 2 like(ECT2L)	Homo sapiens
8507	ENC1	ectodermal-neural cortex 1(ENC1)	Homo sapiens
55120	FANCL	Fanconi anemia complementation group L(FANCL)	Homo sapiens
54850	FBXL12	F-box and leucine rich repeat protein 12(FBXL12)	Homo sapiens
222235	FBXL13	F-box and leucine rich repeat protein 13(FBXL13)	Homo sapiens
144699	FBXL14	F-box and leucine rich repeat protein 14(FBXL14)	Homo sapiens
79176	FBXL15	F-box and leucine rich repeat protein 15(FBXL15)	Homo sapiens
146330	FBXL16	F-box and leucine rich repeat protein 16(FBXL16)	Homo sapiens
80028	FBXL18	F-box and leucine rich repeat protein 18(FBXL18)	Homo sapiens
25827	FBXL2	F-box and leucine rich repeat protein 2(FBXL2)	Homo sapiens
84961	FBXL20	F-box and leucine rich repeat protein 20(FBXL20)	Homo sapiens
26224	FBXL3	F-box and leucine rich repeat protein 3(FBXL3)	Homo sapiens
26235	FBXL4	F-box and leucine rich repeat protein 4(FBXL4)	Homo sapiens
26234	FBXL5	F-box and leucine rich repeat protein 5(FBXL5)	Homo sapiens
26233	FBXL6	F-box and leucine rich repeat protein 6(FBXL6)	Homo sapiens
23194	FBXL7	F-box and leucine rich repeat protein 7(FBXL7)	Homo sapiens
55336	FBXL8	F-box and leucine rich repeat protein 8(FBXL8)	Homo sapiens
26267	FBXO10	F-box protein 10(FBXO10)	Homo sapiens
80204	FBXO11	F-box protein 11(FBXO11)	Homo sapiens
201456	FBXO15	F-box protein 15(FBXO15)	Homo sapiens
157574	FBXO16	F-box protein 16(FBXO16)	Homo sapiens
115290	FBXO17	F-box protein 17(FBXO17)	Homo sapiens
84893	FBXO18	F-box protein, helicase, 18(FBXO18)	Homo sapiens
26232	FBXO2	F-box protein 2(FBXO2)	Homo sapiens
23014	FBXO21	F-box protein 21(FBXO21)	Homo sapiens
26263	FBXO22	F-box protein 22(FBXO22)	Homo sapiens
26261	FBXO24	F-box protein 24(FBXO24)	Homo sapiens
26260	FBXO25	F-box protein 25(FBXO25)	Homo sapiens
126433	FBXO27	F-box protein 27(FBXO27)	Homo sapiens
23219	FBXO28	F-box protein 28(FBXO28)	Homo sapiens
26273	FBXO3	F-box protein 3(FBXO3)	Homo sapiens
84085	FBXO30	F-box protein 30(FBXO30)	Homo sapiens
79791	FBXO31	F-box protein 31(FBXO31)	Homo sapiens
114907	FBXO32	F-box protein 32(FBXO32)	Homo sapiens
254170	FBXO33	F-box protein 33(FBXO33)	Homo sapiens
55030	FBXO34	F-box protein 34(FBXO34)	Homo sapiens
130888	FBXO36	F-box protein 36(FBXO36)	Homo sapiens
81545	FBXO38	F-box protein 38(FBXO38)	Homo sapiens
26272	FBXO4	F-box protein 4(FBXO4)	Homo sapiens
51725	FBXO40	F-box protein 40(FBXO40)	Homo sapiens
150726	FBXO41	F-box protein 41(FBXO41)	Homo sapiens
54455	FBXO42	F-box protein 42(FBXO42)	Homo sapiens
93611	FBXO44	F-box protein 44(FBXO44)	Homo sapiens
200933	FBXO45	F-box protein 45(FBXO45)	Homo sapiens
23403	FBXO46	F-box protein 46(FBXO46)	Homo sapiens
26271	FBXO5	F-box protein 5(FBXO5)	Homo sapiens
26270	FBXO6	F-box protein 6(FBXO6)	Homo sapiens
25793	FBXO7	F-box protein 7(FBXO7)	Homo sapiens
26269	FBXO8	F-box protein 8(FBXO8)	Homo sapiens
26268	FBXO9	F-box protein 9(FBXO9)	Homo sapiens
23291	FBXW11	F-box and WD repeat domain containing 11(FBXW11)	Homo sapiens
26190	FBXW2	F-box and WD repeat domain containing 2(FBXW2)	Homo sapiens
6468	FBXW4	F-box and WD repeat domain containing 4(FBXW4)	Homo sapiens
54461	FBXW5	F-box and WD repeat domain containing 5(FBXW5)	Homo sapiens
55294	FBXW7	F-box and WD repeat domain containing 7(FBXW7)	Homo sapiens
26259	FBXW8	F-box and WD repeat domain containing 8(FBXW8)	Homo sapiens
55632	G2E3	G2/M-phase specific E3 ubiquitin protein ligase(G2E3)	Homo sapiens
8139	GAN	gigaxonin(GAN)	Homo sapiens
64395	GMCL1	germ cell-less, spermatogenesis associated 1(GMCL1)	Homo sapiens
2966	GTF2H2	general transcription factor IIH subunit 2(GTF2H2)	Homo sapiens
64412	GZF1	GDNF inducible zinc finger protein 1(GZF1)	Homo sapiens
57531	HACE1	HECT domain and ankyrin repeat containing E3 ubiquitin protein ligase 1(HACE1)	Homo sapiens
25831	HECTD1	HECT domain E3 ubiquitin protein ligase 1(HECTD1)	Homo sapiens
143279	HECTD2	HECT domain E3 ubiquitin protein ligase 2(HECTD2)	Homo sapiens
79654	HECTD3	HECT domain E3 ubiquitin protein ligase 3(HECTD3)	Homo sapiens
23072	HECW1	HECT, C2 and WW domain containing E3 ubiquitin protein ligase 1(HECW1)	Homo sapiens
57520	HECW2	HECT, C2 and WW domain containing E3 ubiquitin protein ligase 2(HECW2)	Homo sapiens
8925	HERC1	HECT and RLD domain containing E3 ubiquitin protein ligase family member 1(HERC1)	Homo sapiens
8924	HERC2	HECT and RLD domain containing E3 ubiquitin protein ligase 2(HERC2)	Homo sapiens
8916	HERC3	HECT and RLD domain containing E3 ubiquitin protein ligase 3(HERC3)	Homo sapiens
26091	HERC4	HECT and RLD domain containing E3 ubiquitin protein ligase 4(HERC4)	Homo sapiens
51191	HERC5	HECT and RLD domain containing E3 ubiquitin protein ligase 5(HERC5)	Homo sapiens
55008	HERC6	HECT and RLD domain containing E3 ubiquitin protein ligase family member 6(HERC6)	Homo sapiens
3090	HIC1	HIC ZBTB transcriptional repressor 1(HIC1)	Homo sapiens
23119	HIC2	HIC ZBTB transcriptional repressor 2(HIC2)	Homo sapiens
6596	HLTF	helicase like transcription factor(HLTF)	Homo sapiens
10075	HUWE1	HECT, UBA and WWE domain containing 1, E3 ubiquitin protein ligase(HUWE1)	Homo sapiens
25998	IBTK	inhibitor of Bruton tyrosine kinase(IBTK)	Homo sapiens
3652	IPP	intracisternal A particle-promoted polypeptide(IPP)	Homo sapiens
83737	ITCH	itchy E3 ubiquitin protein ligase(ITCH)	Homo sapiens
10625	IVNS1ABP	influenza virus NS1A binding protein(IVNS1ABP)	Homo sapiens
10324	KLHL41 (KBTBD10)	kelch like family member 41(KLHL41)	Homo sapiens
9920	KBTBD11	kelch repeat and BTB domain containing 11(KBTBD11)	Homo sapiens
166348	KBTBD12	kelch repeat and BTB domain containing 12(KBTBD12)	Homo sapiens
25948	KBTBD2	kelch repeat and BTB domain containing 2(KBTBD2)	Homo sapiens
143879	KBTBD3	kelch repeat and BTB domain containing 3(KBTBD3)	Homo sapiens
55709	KBTBD4	kelch repeat and BTB domain containing 4(KBTBD4)	Homo sapiens
131377	KLHL40 (KBTBD5)	kelch like family member 40(KLHL40)	Homo sapiens
89890	KBTBD6	kelch repeat and BTB domain containing 6(KBTBD6)	Homo sapiens
84078	KBTBD7	kelch repeat and BTB domain containing 7(KBTBD7)	Homo sapiens
84541	KBTBD8	kelch repeat and BTB domain containing 8(KBTBD8)	Homo sapiens
3736	KCNA1	potassium voltage-gated channel subfamily A member 1(KCNA1)	Homo sapiens
3744	KCNA10	potassium voltage-gated channel subfamily A member 10(KCNA10)	Homo sapiens
3737	KCNA2	potassium voltage-gated channel subfamily A member 2(KCNA2)	Homo sapiens
3738	KCNA3	potassium voltage-gated channel subfamily A member 3(KCNA3)	Homo sapiens
3739	KCNA4	potassium voltage-gated channel subfamily A member 4(KCNA4)	Homo sapiens
3741	KCNA5	potassium voltage-gated channel subfamily A member 5(KCNA5)	Homo sapiens
3742	KCNA6	potassium voltage-gated channel subfamily A member 6(KCNA6)	Homo sapiens
3743	KCNA7	potassium voltage-gated channel subfamily A member 7(KCNA7)	Homo sapiens
3745	KCNB1	potassium voltage-gated channel subfamily B member 1(KCNB1)	Homo sapiens
9312	KCNB2	potassium voltage-gated channel subfamily B member 2(KCNB2)	Homo sapiens
3746	KCNC1	potassium voltage-gated channel subfamily C member 1(KCNC1)	Homo sapiens
3747	KCNC2	potassium voltage-gated channel subfamily C member 2(KCNC2)	Homo sapiens
3748	KCNC3	potassium voltage-gated channel subfamily C member 3(KCNC3)	Homo sapiens
3749	KCNC4	potassium voltage-gated channel subfamily C member 4(KCNC4)	Homo sapiens
3750	KCND1	potassium voltage-gated channel subfamily D member 1(KCND1)	Homo sapiens
3751	KCND2	potassium voltage-gated channel subfamily D member 2(KCND2)	Homo sapiens
3752	KCND3	potassium voltage-gated channel subfamily D member 3(KCND3)	Homo sapiens
3755	KCNG1	potassium voltage-gated channel modifier subfamily G member 1(KCNG1)	Homo sapiens
170850	KCNG3	potassium voltage-gated channel modifier subfamily G member 3(KCNG3)	Homo sapiens
283518	KCNRG	potassium channel regulator(KCNRG)	Homo sapiens
3787	KCNS1	potassium voltage-gated channel modifier subfamily S member 1(KCNS1)	Homo sapiens
3788	KCNS2	potassium voltage-gated channel modifier subfamily S member 2(KCNS2)	Homo sapiens
3790	KCNS3	potassium voltage-gated channel modifier subfamily S member 3(KCNS3)	Homo sapiens
27012	KCNV1	potassium voltage-gated channel modifier subfamily V member 1(KCNV1)	Homo sapiens
284252	KCTD1	potassium channel tetramerization domain containing 1(KCTD1)	Homo sapiens
83892	KCTD10	potassium channel tetramerization domain containing 10(KCTD10)	Homo sapiens
115207	KCTD12	potassium channel tetramerization domain containing 12(KCTD12)	Homo sapiens
253980	KCTD13	potassium channel tetramerization domain containing 13(KCTD13)	Homo sapiens
65987	KCTD14	potassium channel tetramerization domain containing 14(KCTD14)	Homo sapiens
79047	KCTD15	potassium channel tetramerization domain containing 15(KCTD15)	Homo sapiens
57528	KCTD16	potassium channel tetramerization domain containing 16(KCTD16)	Homo sapiens
79734	KCTD17	potassium channel tetramerization domain containing 17(KCTD17)	Homo sapiens
23510	KCTD2	potassium channel tetramerization domain containing 2(KCTD2)	Homo sapiens
222658	KCTD20	potassium channel tetramerization domain containing 20(KCTD20)	Homo sapiens
283219	KCTD21	potassium channel tetramerization domain containing 21(KCTD21)	Homo sapiens
51133	KCTD3	potassium channel tetramerization domain containing 3(KCTD3)	Homo sapiens
386618	KCTD4	potassium channel tetramerization domain containing 4(KCTD4)	Homo sapiens
54442	KCTD5	potassium channel tetramerization domain containing 5(KCTD5)	Homo sapiens
200845	KCTD6	potassium channel tetramerization domain containing 6(KCTD6)	Homo sapiens
154881	KCTD7	potassium channel tetramerization domain containing 7(KCTD7)	Homo sapiens
154881	KCTD7	potassium channel tetramerization domain containing 7(KCTD7)	Homo sapiens
386617	KCTD8	potassium channel tetramerization domain containing 8(KCTD8)	Homo sapiens
54793	KCTD9	potassium channel tetramerization domain containing 9(KCTD9)	Homo sapiens
22992	KDM2A	lysine demethylase 2A(KDM2A)	Homo sapiens
84678	KDM2B	lysine demethylase 2B(KDM2B)	Homo sapiens
9817	KEAP1	kelch like ECH associated protein 1(KEAP1)	Homo sapiens
9870	AREL1 (KIAA0317)	apoptosis resistant E3 ubiquitin protein ligase 1(AREL1)	Homo sapiens
57542	KLHL42 (KLHDC5)	kelch like family member 42(KLHL42)	Homo sapiens
57626	KLHL1	kelch like family member 1(KLHL1)	Homo sapiens
317719	KLHL10	kelch like family member 10(KLHL10)	Homo sapiens
55175	KLHL11	kelch like family member 11(KLHL11)	Homo sapiens
59349	KLHL12	kelch like family member 12(KLHL12)	Homo sapiens
90293	KLHL13	kelch like family member 13(KLHL13)	Homo sapiens
57565	KLHL14	kelch like family member 14(KLHL14)	Homo sapiens
80311	KLHL15	kelch like family member 15(KLHL15)	Homo sapiens
339451	KLHL17	kelch like family member 17(KLHL17)	Homo sapiens
23276	KLHL18	kelch like family member 18(KLHL18)	Homo sapiens
27252	KLHL20	kelch like family member 20(KLHL20)	Homo sapiens
9903	KLHL21	kelch like family member 21(KLHL21)	Homo sapiens
84861	KLHL22	kelch like family member 22(KLHL22)	Homo sapiens
151230	KLHL23	kelch like family member 23(KLHL23)	Homo sapiens
54800	KLHL24	kelch like family member 24(KLHL24)	Homo sapiens
64410	KLHL25	kelch like family member 25(KLHL25)	Homo sapiens
55295	KLHL26	kelch like family member 26(KLHL26)	Homo sapiens
54813	KLHL28	kelch like family member 28(KLHL28)	Homo sapiens
114818	KLHL29	kelch like family member 29(KLHL29)	Homo sapiens
26249	KLHL3	kelch like family member 3(KLHL3)	Homo sapiens
377007	KLHL30	kelch like family member 30(KLHL30)	Homo sapiens
401265	KLHL31	kelch like family member 31(KLHL31)	Homo sapiens
114792	KLHL32	kelch like family member 32(KLHL32)	Homo sapiens
123103	KLHL33	kelch like family member 33(KLHL33)	Homo sapiens
257240	KLHL34	kelch like family member 34(KLHL34)	Homo sapiens
79786	KLHL36	kelch like family member 36(KLHL36)	Homo sapiens
340359	KLHL38	kelch like family member 38(KLHL38)	Homo sapiens
56062	KLHL4	kelch like family member 4(KLHL4)	Homo sapiens
51088	KLHL5	kelch like family member 5(KLHL5)	Homo sapiens
89857	KLHL6	kelch like family member 6(KLHL6)	Homo sapiens
55975	KLHL7	kelch like family member 7(KLHL7)	Homo sapiens
57563	KLHL8	kelch like family member 8(KLHL8)	Homo sapiens
55958	KLHL9	kelch like family member 9(KLHL9)	Homo sapiens
3856	KRT8	keratin 8(KRT8)	Homo sapiens
3959	LGALS3BP	galectin 3 binding protein(LGALS3BP)	Homo sapiens
84708	LNX1	ligand of numb-protein X 1(LNX1)	Homo sapiens
222484	LNX2	ligand of numb-protein X 2(LNX2)	Homo sapiens
91694	LONRF1	LON peptidase N-terminal domain and ring finger 1(LONRF1)	Homo sapiens
164832	LONRF2	LON peptidase N-terminal domain and ring finger 2(LONRF2)	Homo sapiens
79836	LONRF3	LON peptidase N-terminal domain and ring finger 3(LONRF3)	Homo sapiens
26231	LRRC29	leucine rich repeat containing 29(LRRC29)	Homo sapiens
90678	LRSAM1	leucine rich repeat and sterile alpha motif containing 1(LRSAM1)	Homo sapiens
8216	LZTR1	leucine zipper like transcription regulator 1(LZTR1)	Homo sapiens
4214	MAP3K1	mitogen-activated protein kinase kinase kinase 1(MAP3K1)	Homo sapiens
55016	MARCH1	membrane associated ring-CH-type finger 1(MARCH1)	Homo sapiens
162333	MARCH10	membrane associated ring-CH-type finger 10(MARCH10)	Homo sapiens
441061	MARCH11	membrane associated ring-CH-type finger 11(MARCH11)	Homo sapiens
51257	MARCH2	membrane associated ring-CH-type finger 2(MARCH2)	Homo sapiens
115123	MARCH3	membrane associated ring-CH-type finger 3(MARCH3)	Homo sapiens
57574	MARCH4	membrane associated ring-CH-type finger 4(MARCH4)	Homo sapiens
54708	MARCH5	membrane associated ring-CH-type finger 5(MARCH5)	Homo sapiens
10299	MARCH6	membrane associated ring-CH-type finger 6(MARCH6)	Homo sapiens
64844	MARCH7	membrane associated ring-CH-type finger 7(MARCH7)	Homo sapiens
220972	MARCH8	membrane associated ring-CH-type finger 8(MARCH8)	Homo sapiens
92979	MARCH9	membrane associated ring-CH-type finger 9(MARCH9)	Homo sapiens
4193	MDM2	MDM2 proto-oncogene(MDM2)	Homo sapiens
4194	MDM4	MDM4, p53 regulator(MDM4)	Homo sapiens
92312	MEX3A	mex-3 RNA binding family member A(MEX3A)	Homo sapiens
84206	MEX3B	mex-3 RNA binding family member B(MEX3B)	Homo sapiens
51320	MEX3C	mex-3 RNA binding family member C(MEX3C)	Homo sapiens
399664	MEX3D	mex-3 RNA binding family member D(MEX3D)	Homo sapiens
196872	LINC00638 (MGC23270)	long intergenic non-protein coding RNA 638	Homo sapiens
23295	MGRN1	mahogunin ring finger 1(MGRN1)	Homo sapiens
57534	MIB1	mindbomb E3 ubiquitin protein ligase 1(MIB1)	Homo sapiens
142678	MIB2	mindbomb E3 ubiquitin protein ligase 2(MIB2)	Homo sapiens
4281	MID1	midline 1(MID1)	Homo sapiens
11043	MID2	midline 2(MID2)	Homo sapiens
23608	MKRN1	makorin ring finger protein 1(MKRN1)	Homo sapiens
23609	MKRN2	makorin ring finger protein 2(MKRN2)	Homo sapiens
7681	MKRN3	makorin ring finger protein 3(MKRN3)	Homo sapiens
4331	MNAT1	MNAT1, CDK activating kinase assembly factor(MNAT1)	Homo sapiens
55167	MSL2	male-specific lethal 2 homolog (Drosophila)(MSL2)	Homo sapiens
79594	MUL1	mitochondrial E3 ubiquitin protein ligase 1(MUL1)	Homo sapiens
23077	MYCBP2	MYC binding protein 2, E3 ubiquitin protein ligase(MYCBP2)	Homo sapiens
29116	MYLIP	myosin regulatory light chain interacting protein(MYLIP)	Homo sapiens
55892	MYNN	myoneurin(MYNN)	Homo sapiens
112939	NACC1	nucleus accumbens associated 1(NACC1)	Homo sapiens
138151	NACC2	NACC family member 2(NACC2)	Homo sapiens
4734	NEDD4	neural precursor cell expressed, developmentally down-regulated 4, E3 ubiquitin protein ligase(NEDD4)	Homo sapiens
23327	NEDD4L	neural precursor cell expressed, developmentally down-regulated 4-like, E3 ubiquitin protein ligase(NEDD4L)	Homo sapiens
9148	NEURL1(NEURL)	neuralized E3 ubiquitin protein ligase 1(NEURL1)	Homo sapiens
140825	NEURL2	neuralized E3 ubiquitin protein ligase 2(NEURL2)	Homo sapiens
93082	NEURL3	neuralized E3 ubiquitin protein ligase 3(NEURL3)	Homo sapiens
4799	NFX1	nuclear transcription factor, X-box binding 1(NFX1)	Homo sapiens
152518	NFXL1	nuclear transcription factor, X-box binding like 1(NFXL1)	Homo sapiens
378884	NHLRC1	NHL repeat containing E3 ubiquitin protein ligase 1(NHLRC1)	Homo sapiens
51070	NOSIP	nitric oxide synthase interacting protein(NOSIP)	Homo sapiens
197370	NSMCE1	NSE1 homolog, SMC5-SMC6 complex component(NSMCE1)	Homo sapiens
28962	OSTM1	osteopetrosis associated transmembrane protein 1(OSTM1)	Homo sapiens
161725	OTUD7A	OTU deubiquitinase 7A(OTUD7A)	Homo sapiens
56957	OTUD7B	OTU deubiquitinase 7B(OTUD7B)	Homo sapiens
5071	PARK2	parkin RBR E3 ubiquitin protein ligase(PARK2)	Homo sapiens
23598	PATZ1	POZ/BTB and AT hook containing zinc finger 1(PATZ1)	Homo sapiens
84759	PCGF1	polycomb group ring finger 1(PCGF1)	Homo sapiens
7703	PCGF2	polycomb group ring finger 2(PCGF2)	Homo sapiens
10336	PCGF3	polycomb group ring finger 3(PCGF3)	Homo sapiens
84333	PCGF5	polycomb group ring finger 5(PCGF5)	Homo sapiens
84108	PCGF6	polycomb group ring finger 6(PCGF6)	Homo sapiens
23024	PDZRN3	PDZ domain containing ring finger 3(PDZRN3)	Homo sapiens
29951	PDZRN4	PDZ domain containing ring finger 4(PDZRN4)	Homo sapiens
5192	PEX10	peroxisomal biogenesis factor 10(PEX10)	Homo sapiens
5193	PEX12	peroxisomal biogenesis factor 12(PEX12)	Homo sapiens
5828	PEX2	peroxisomal biogenesis factor 2(PEX2)	Homo sapiens
51533	PHF7	PHD finger protein 7(PHF7)	Homo sapiens
57661	PHRF1	PHD and ring finger domains 1(PHRF1)	Homo sapiens
64219	PJA1	praja ring finger ubiquitin ligase 1(PJA1)	Homo sapiens
9867	PJA2	praja ring finger ubiquitin ligase 2(PJA2)	Homo sapiens
5371	PML	promyelocytic leukemia(PML)	Homo sapiens
23759	PPIL2	peptidylprolyl isomerase like 2(PPIL2)	Homo sapiens
27339	PRPF19	pre-mRNA processing factor 19(PRPF19)	Homo sapiens
142684	RAB40A	RAB40A, member RAS oncogene family(RAB40A)	Homo sapiens
282808	RAB40AL	RAB40A, member RAS oncogene family-like(RAB40AL)	Homo sapiens
10966	RAB40B	RAB40B, member RAS oncogene family(RAB40B)	Homo sapiens
57799	RAB40C	RAB40C, member RAS oncogene family(RAB40C)	Homo sapiens
27342	RABGEF1	RAB guanine nucleotide exchange factor 1(RABGEF1)	Homo sapiens
56852	RAD18	RAD18, E3 ubiquitin protein ligase(RAD18)	Homo sapiens
5896	RAG1	recombination activating 1(RAG1)	Homo sapiens
5913	RAPSN	receptor associated protein of the synapse(RAPSN)	Homo sapiens
5930	RBBP6	RB binding protein 6, ubiquitin ligase(RBBP6)	Homo sapiens
10616	RBCK1	RANBP2-type and C3HC4-type zinc finger containing 1(RBCK1)	Homo sapiens
9978	RBX1	ring-box 1(RBX1)	Homo sapiens
149041	RC3H1	ring finger and CCCH-type domains 1(RC3H1)	Homo sapiens
54542	RC3H2	ring finger and CCCH-type domains 2(RC3H2)	Homo sapiens
55213	RCBTB1	RCC1 and BTB domain containing protein 1(RCBTB1)	Homo sapiens
1102	RCBTB2	RCC1 and BTB domain containing protein 2(RCBTB2)	Homo sapiens
25898	RCHY1	ring finger and CHY zinc finger domain containing 1(RCHY1)	Homo sapiens
117584	RFFL	ring finger and FYVE like domain containing E3 ubiquitin protein ligase(RFFL)	Homo sapiens
5988	RFPL1	ret finger protein like 1(RFPL1)	Homo sapiens
10738	RFPL3	ret finger protein like 3(RFPL3)	Homo sapiens
342931	RFPL4A	ret finger protein like 4A(RFPL4A)	Homo sapiens
442247	RFPL4B	ret finger protein like 4B(RFPL4B)	Homo sapiens
64326	RFWD2	ring finger and WD repeat domain 2(RFWD2)	Homo sapiens
55159	RFWD3	ring finger and WD repeat domain 3(RFWD3)	Homo sapiens
9886	RHOBTB1	Rho related BTB domain containing 1(RHOBTB1)	Homo sapiens
23221	RHOBTB2	Rho related BTB domain containing 2(RHOBTB2)	Homo sapiens
22836	RHOBTB3	Rho related BTB domain containing 3(RHOBTB3)	Homo sapiens
6015	RING1	ring finger protein 1(RING1)	Homo sapiens
51132	RLIM	ring finger protein, LIM domain interacting(RLIM)	Homo sapiens
9921	RNF10	ring finger protein 10(RNF10)	Homo sapiens
7844	RNF103	ring finger protein 103(RNF103)	Homo sapiens
26994	RNF11	ring finger protein 11(RNF11)	Homo sapiens
54778	RNF111	ring finger protein 111(RNF111)	Homo sapiens
7732	RNF112	ring finger protein 112(RNF112)	Homo sapiens
7737	RNF113A	ring finger protein 113A(RNF113A)	Homo sapiens
140432	RNF113B	ring finger protein 113B(RNF113B)	Homo sapiens
55905	RNF114	ring finger protein 114(RNF114)	Homo sapiens
27246	RNF115	ring finger protein 115(RNF115)	Homo sapiens
55298	RNF121	ring finger protein 121(RNF121)	Homo sapiens
79845	RNF122	ring finger protein 122(RNF122)	Homo sapiens
63891	RNF123	ring finger protein 123(RNF123)	Homo sapiens
54941	RNF125	ring finger protein 125(RNF125)	Homo sapiens
55658	RNF126	ring finger protein 126(RNF126)	Homo sapiens
79589	RNF128	ring finger protein 128, E3 ubiquitin protein ligase(RNF128)	Homo sapiens
11342	RNF13	ring finger protein 13(RNF13)	Homo sapiens
55819	RNF130	ring finger protein 130(RNF130)	Homo sapiens
168433	RNF133	ring finger protein 133(RNF133)	Homo sapiens
84282	RNF135	ring finger protein 135(RNF135)	Homo sapiens
51444	RNF138	ring finger protein 138(RNF138)	Homo sapiens
11236	RNF139	ring finger protein 139(RNF139)	Homo sapiens
9604	RNF14	ring finger protein 14(RNF14)	Homo sapiens
50862	RNF141	ring finger protein 141(RNF141)	Homo sapiens
9781	RNF144A	ring finger protein 144A(RNF144A)	Homo sapiens
255488	RNF144B	ring finger protein 144B(RNF144A)	Homo sapiens
153830	RNF145	ring finger protein 145(RNF145)	Homo sapiens
81847	RNF146	ring finger protein 146(RNF146)	Homo sapiens
378925	RNF148	ring finger protein 148(RNF148)	Homo sapiens
284996	RNF149	ring finger protein 149(RNF149)	Homo sapiens
57484	RNF150	ring finger protein 150(RNF150)	Homo sapiens
146310	RNF151	ring finger protein 151(RNF151)	Homo sapiens
220441	RNF152	ring finger protein 152(RNF152)	Homo sapiens
114804	RNF157	ring finger protein 157(RNF157)	Homo sapiens
26046	LTN1 (RNF160)	listerin E3 ubiquitin protein ligase 1(LTN1)	Homo sapiens
494470	RNF165	ring finger protein 165(RNF165)	Homo sapiens
115992	RNF166	ring finger protein 166(RNF166)	Homo sapiens
26001	RNF167	ring finger protein 167(RNF167)	Homo sapiens
165918	RNF168	ring finger protein 168(RNF168)	Homo sapiens
254225	RNF169	ring finger protein 169(RNF169)	Homo sapiens
56163	RNF17	ring finger protein 17(RNF17)	Homo sapiens
81790	RNF170	ring finger protein 170(RNF170)	Homo sapiens
285533	RNF175	ring finger protein 175(RNF175)	Homo sapiens
285671	RNF180	ring finger protein 180(RNF180)	Homo sapiens
51255	RNF181	ring finger protein 181(RNF181)	Homo sapiens
221687	RNF182	ring finger protein 182(RNF182)	Homo sapiens
138065	RNF183	ring finger protein 183(RNF183)	Homo sapiens
91445	RNF185	ring finger protein 185(RNF185)	Homo sapiens
54546	RNF186	ring finger protein 186(RNF186)	Homo sapiens
149603	RNF187	ring finger protein 187(RNF187)	Homo sapiens
25897	RNF19A	ring finger protein 19A, RBR E3 ubiquitin protein ligase(RNF19A)	Homo sapiens
127544	RNF19B	ring finger protein 19B(RNF19B)	Homo sapiens
6045	RNF2	ring finger protein 2(RNF2)	Homo sapiens
56254	RNF20	ring finger protein 20(RNF20)	Homo sapiens
388591	RNF207	ring finger protein 207(RNF207)	Homo sapiens
727800	RNF208	ring finger protein 208(RNF208)	Homo sapiens
285498	RNF212	ring finger protein 212(RNF212)	Homo sapiens
57674	RNF213	ring finger protein 213(RNF213)	Homo sapiens
257160	RNF214	ring finger protein 214(RNF214)	Homo sapiens
200312	RNF215	ring finger protein 215(RNF215)	Homo sapiens
54476	RNF216	ring finger protein 216(RNF216)	Homo sapiens
154214	RNF217	ring finger protein 217(RNF217)	Homo sapiens
79596	RNF219	ring finger protein 219(RNF219)	Homo sapiens
55182	RNF220	ring finger protein 220(RNF220)	Homo sapiens
11237	RNF24	ring finger protein 24(RNF24)	Homo sapiens
64320	RNF25	ring finger protein 25(RNF25)	Homo sapiens
79102	RNF26	ring finger protein 26(RNF26)	Homo sapiens
55072	RNF31	ring finger protein 31(RNF31)	Homo sapiens
140545	RNF32	ring finger protein 32(RNF32)	Homo sapiens
80196	RNF34	ring finger protein 34(RNF34)	Homo sapiens
152006	RNF38	ring finger protein 38(RNF38)	Homo sapiens
80352	RNF39	ring finger protein 39(RNF39)	Homo sapiens
6047	RNF4	ring finger protein 4(RNF4)	Homo sapiens
9810	RNF40	ring finger protein 40(RNF40)	Homo sapiens
10193	RNF41	ring finger protein 41(RNF41)	Homo sapiens
54894	RNF43	ring finger protein 43(RNF43)	Homo sapiens
22838	RNF44	ring finger protein 44(RNF44)	Homo sapiens
6048	RNF5	ring finger protein 5(RNF5)	Homo sapiens
6049	RNF6	ring finger protein 6(RNF6)	Homo sapiens
9616	RNF7	ring finger protein 7(RNF7)	Homo sapiens
9025	RNF8	ring finger protein 8(RNF8)	Homo sapiens
51136	RNFT1	ring finger protein, transmembrane 1(RNFT1)	Homo sapiens
89970	RSPRY1	ring finger and SPRY domain containing 1(RSPRY1)	Homo sapiens
23450	SF3B3	splicing factor 3b subunit 3(SF3B3)	Homo sapiens
57630	SH3RF1	SH3 domain containing ring finger 1(SH3RF1)	Homo sapiens
153769	SH3RF2	SH3 domain containing ring finger 2(SH3RF2)	Homo sapiens
92799	SHKBP1	SH3KBP1 binding protein 1(SHKBP1)	Homo sapiens
257218	SHPRH	SNF2 histone linker PHD RING helicase(SHPRH)	Homo sapiens
6477	SIAH1	siah E3 ubiquitin protein ligase 1(SIAH1)	Homo sapiens
6478	SIAH2	siah E3 ubiquitin protein ligase 2(SIAH2)	Homo sapiens
6502	SKP2	S-phase kinase associated protein 2(SKP2)	Homo sapiens
57154	SMURF1	SMAD specific E3 ubiquitin protein ligase 1(SMURF1)	Homo sapiens
64750	SMURF2	SMAD specific E3 ubiquitin protein ligase 2(SMURF2)	Homo sapiens
8651	SOCS1	suppressor of cytokine signaling 1(SOCS1)	Homo sapiens
8835	SOCS2	suppressor of cytokine signaling 2(SOCS2)	Homo sapiens
9021	SOCS3	suppressor of cytokine signaling 3(SOCS3)	Homo sapiens
122809	SOCS4	suppressor of cytokine signaling 4(SOCS4)	Homo sapiens
9655	SOCS5	suppressor of cytokine signaling 5(SOCS5)	Homo sapiens
9306	SOCS6	suppressor of cytokine signaling 6(SOCS6)	Homo sapiens
30837	SOCS7	suppressor of cytokine signaling 7(SOCS7)	Homo sapiens
8405	SPOP	speckle type BTB/POZ protein(SPOP)	Homo sapiens
339745	SPOPL	speckle type BTB/POZ protein like(SPOPL)	Homo sapiens
84767	TRIM51 (SPRYD5)	tripartite motif-containing 51(TRIM51)	Homo sapiens
80176	SPSB1	splA/ryanodine receptor domain and SOCS box containing 1(SPSB1)	Homo sapiens
84727	SPSB2	splA/ryanodine receptor domain and SOCS box containing 2(SPSB2)	Homo sapiens
90864	SPSB3	splA/ryanodine receptor domain and SOCS box containing 3(SPSB3)	Homo sapiens
92369	SPSB4	splA/ryanodine receptor domain and SOCS box containing 4(SPSB4)	Homo sapiens
10273	STUB1	STIP1 homology and U-box containing protein 1(STUB1)	Homo sapiens
84447	SYVN1	synoviolin 1(SYVN1)	Homo sapiens
6924	TCEB3	transcription elongation factor B subunit 3(TCEB3)	Homo sapiens
7126	TNFAIP1	TNF alpha induced protein 1(TNFAIP1)	Homo sapiens
7128	TNFAIP3	TNF alpha induced protein 3(TNFAIP3)	Homo sapiens
10210	TOPORS	TOP1 binding arginine/serine rich protein(TOPORS)	Homo sapiens
7186	TRAF2	TNF receptor associated factor 2(TRAF2)	Homo sapiens
7187	TRAF3	TNF receptor associated factor 3(TRAF3)	Homo sapiens
9618	TRAF4	TNF receptor associated factor 4(TRAF4)	Homo sapiens
7188	TRAF5	TNF receptor associated factor 5(TRAF5)	Homo sapiens
7189	TRAF6	TNF receptor associated factor 6(TRAF6)	Homo sapiens
84231	TRAF7	TNF receptor associated factor 7(TRAF7)	Homo sapiens
10293	TRAIP	TRAF interacting protein(TRAIP)	Homo sapiens
10107	TRIM10	tripartite motif containing 10(TRIM10)	Homo sapiens
81559	TRIM11	tripartite motif containing 11(TRIM11)	Homo sapiens
10206	TRIM13	tripartite motif containing 13(TRIM13)	Homo sapiens
89870	TRIM15	tripartite motif containing 15(TRIM15)	Homo sapiens
51127	TRIM17	tripartite motif containing 17(TRIM17)	Homo sapiens
23321	TRIM2	tripartite motif containing 2(TRIM2)	Homo sapiens
6737	TRIM21	tripartite motif containing 21(TRIM21)	Homo sapiens
10346	TRIM22	tripartite motif containing 22(TRIM22)	Homo sapiens
373	TRIM23	tripartite motif containing 23(TRIM23)	Homo sapiens
8805	TRIM24	tripartite motif containing 24(TRIM24)	Homo sapiens
7706	TRIM25	tripartite motif containing 25(TRIM25)	Homo sapiens
7726	TRIM26	tripartite motif containing 26(TRIM26)	Homo sapiens
5987	TRIM27	tripartite motif containing 27(TRIM27)	Homo sapiens
10155	TRIM28	tripartite motif containing 28(TRIM28)	Homo sapiens
10612	TRIM3	tripartite motif containing 3(TRIM3)	Homo sapiens
11074	TRIM31	tripartite motif containing 31(TRIM31)	Homo sapiens
22954	TRIM32	tripartite motif containing 32(TRIM32)	Homo sapiens
51592	TRIM33	tripartite motif containing 33(TRIM33)	Homo sapiens
53840	TRIM34	tripartite motif containing 34(TRIM34)	Homo sapiens
23087	TRIM35	tripartite motif containing 35(TRIM35)	Homo sapiens
55521	TRIM36	tripartite motif containing 36(TRIM36)	Homo sapiens
4591	TRIM37	tripartite motif containing 37(TRIM37)	Homo sapiens
10475	TRIM38	tripartite motif containing 38(TRIM38)	Homo sapiens
56658	TRIM39	tripartite motif containing 39(TRIM39)	Homo sapiens
89122	TRIM4	tripartite motif containing 4(TRIM4)	Homo sapiens
135644	TRIM40	tripartite motif containing 40(TRIM40)	Homo sapiens
90933	TRIM41	tripartite motif containing 41(TRIM41)	Homo sapiens
287015	TRIM42	tripartite motif containing 42(TRIM42)	Homo sapiens
129868	TRIM43	tripartite motif containing 43(TRIM43)	Homo sapiens
80263	TRIM45	tripartite motif containing 45(TRIM45)	Homo sapiens
80128	TRIM46	tripartite motif containing 46(TRIM46)	Homo sapiens
91107	TRIM47	tripartite motif containing 47(TRIM47)	Homo sapiens
79097	TRIM48	tripartite motif containing 48(TRIM48)	Homo sapiens
57093	TRIM49	tripartite motif containing 49(TRIM49)	Homo sapiens
85363	TRIM5	tripartite motif containing 5(TRIM5)	Homo sapiens
135892	TRIM50	tripartite motif containing 50(TRIM50)	Homo sapiens
84851	TRIM52	tripartite motif containing 52(TRIM52)	Homo sapiens
57159	TRIM54	tripartite motif containing 54(TRIM54)	Homo sapiens
84675	TRIM55	tripartite motif containing 55(TRIM55)	Homo sapiens
81844	TRIM56	tripartite motif containing 56(TRIM56)	Homo sapiens
25893	TRIM58	tripartite motif containing 58(TRIM58)	Homo sapiens
286827	TRIM59	tripartite motif containing 59(TRIM59)	Homo sapiens
117854	TRIM6	tripartite motif containing 6(TRIM6)	Homo sapiens
166655	TRIM60	tripartite motif containing 60(TRIM60)	Homo sapiens
391712	TRIM61	tripartite motif containing 61(TRIM61)	Homo sapiens
55223	TRIM62	tripartite motif containing 62(TRIM62)	Homo sapiens
84676	TRIM63	tripartite motif containing 63(TRIM63)	Homo sapiens
120146	TRIM64	tripartite motif containing 64(TRIM64)	Homo sapiens
201292	TRIM65	tripartite motif containing 65(TRIM65)	Homo sapiens
440730	TRIM67	tripartite motif containing 67(TRIM67)	Homo sapiens
55128	TRIM68	tripartite motif containing 68(TRIM68)	Homo sapiens
140691	TRIM69	tripartite motif containing 69(TRIM69)	Homo sapiens
81786	TRIM7	tripartite motif containing 7(TRIM7)	Homo sapiens
493829	TRIM72	tripartite motif containing 72(TRIM72)	Homo sapiens
378108	TRIM74	tripartite motif containing 74(TRIM74)	Homo sapiens
390231	TRIM77	tripartite motif containing 77(TRIM77)	Homo sapiens
81603	TRIM8	tripartite motif containing 8(TRIM8)	Homo sapiens
114088	TRIM9	tripartite motif containing 9(TRIM9)	Homo sapiens
339976	TRIML1	tripartite motif family like 1(TRIML1)	Homo sapiens
9320	TRIP12	thyroid hormone receptor interactor 12(TRIP12)	Homo sapiens
7267	TTC3	tetratricopeptide repeat domain 3(TTC3)	Homo sapiens
56995	TULP4	tubby like protein 4(TULP4)	Homo sapiens
7337	UBE3A	ubiquitin protein ligase E3A(UBE3A)	Homo sapiens
89910	UBE3B	ubiquitin protein ligase E3B(UBE3B)	Homo sapiens
9690	UBE3C	ubiquitin protein ligase E3C(UBE3C)	Homo sapiens
9354	UBE4A	ubiquitination factor E4A(UBE4A)	Homo sapiens
10277	UBE4B	ubiquitination factor E4B(UBE4B)	Homo sapiens
22888	UBOX5	U-box domain containing 5(UBOX5)	Homo sapiens
22888	UBOX5	U-box domain containing 5(UBOX5)	Homo sapiens
197131	UBR1	ubiquitin protein ligase E3 component n-recognin 1(UBR1)	Homo sapiens
23304	UBR2	ubiquitin protein ligase E3 component n-recognin 2(UBR2)	Homo sapiens
130507	UBR3	ubiquitin protein ligase E3 component n-recognin 3 (putative)(UBR3)	Homo sapiens
23352	UBR4	ubiquitin protein ligase E3 component n-recognin 4(UBR4)	Homo sapiens
51366	UBR5	ubiquitin protein ligase E3 component n-recognin 5(UBR5)	Homo sapiens
29128	UHRF1	ubiquitin like with PHD and ring finger domains 1(UHRF1)	Homo sapiens
115426	UHRF2	ubiquitin like with PHD and ring finger domains 2(UHRF2)	Homo sapiens
85451	UNK	unkempt family zinc finger(UNK)	Homo sapiens
64718	UNKL	unkempt family like zinc finger(UNKL)	Homo sapiens
7428	VHL	von Hippel-Lindau tumor suppressor(VHL)	Homo sapiens
55823	VPS11	VPS11, CORVET/HOPS core subunit(VPS11)	Homo sapiens
57617	VPS18	VPS18, CORVET/HOPS core subunit(VPS18)	Homo sapiens
27072	VPS41	VPS41, HOPS complex subunit(VPS41)	Homo sapiens
23355	VPS8	VPS8, CORVET complex subunit(VPS8)	Homo sapiens
151525	WDSUB1	WD repeat, sterile alpha motif and U-box domain containing 1(WDSUB1)	Homo sapiens
7468	WHSC1	Wolf-Hirschhorn syndrome candidate 1(WHSC1)	Homo sapiens
26118	WSB1	WD repeat and SOCS box containing 1(WSB1)	Homo sapiens
55884	WSB2	WD repeat and SOCS box containing 2(WSB2)	Homo sapiens
11059	WWP1	WW domain containing E3 ubiquitin protein ligase 1(WWP1)	Homo sapiens
11060	WWP2	WW domain containing E3 ubiquitin protein ligase 2(WWP2)	Homo sapiens
331	XIAP	X-linked inhibitor of apoptosis(XIAP)	Homo sapiens
22890	ZBTB1	zinc finger and BTB domain containing 1(ZBTB1)	Homo sapiens
65986	ZBTB10	zinc finger and BTB domain containing 10(ZBTB10)	Homo sapiens
27107	ZBTB11	zinc finger and BTB domain containing 11(ZBTB11)	Homo sapiens
221527	ZBTB12	zinc finger and BTB domain containing 12(ZBTB12)	Homo sapiens
7704	ZBTB16	zinc finger and BTB domain containing 16(ZBTB16)	Homo sapiens
7709	ZBTB17	zinc finger and BTB domain containing 17(ZBTB17)	Homo sapiens
57621	ZBTB2	zinc finger and BTB domain containing 2(ZBTB2)	Homo sapiens
26137	ZBTB20	zinc finger and BTB domain containing 20(ZBTB20)	Homo sapiens
9278	ZBTB22	zinc finger and BTB domain containing 22(ZBTB22)	Homo sapiens
9841	ZBTB24	zinc finger and BTB domain containing 24(ZBTB24)	Homo sapiens
7597	ZBTB25	zinc finger and BTB domain containing 25(ZBTB25)	Homo sapiens
57684	ZBTB26	zinc finger and BTB domain containing 26(ZBTB26)	Homo sapiens
79842	ZBTB3	zinc finger and BTB domain containing 3(ZBTB3)	Homo sapiens
27033	ZBTB32	zinc finger and BTB domain containing 32(ZBTB32)	Homo sapiens
10009	ZBTB33	zinc finger and BTB domain containing 33(ZBTB33)	Homo sapiens
84614	ZBTB37	zinc finger and BTB domain containing 37(ZBTB37)	Homo sapiens
253461	ZBTB38	zinc finger and BTB domain containing 38(ZBTB38)	Homo sapiens
9880	ZBTB39	zinc finger and BTB domain containing 39(ZBTB39)	Homo sapiens
57659	ZBTB4	zinc finger and BTB domain containing 4(ZBTB4)	Homo sapiens
9923	ZBTB40	zinc finger and BTB domain containing 40(ZBTB40)	Homo sapiens
360023	ZBTB41	zinc finger and BTB domain containing 41(ZBTB41)	Homo sapiens
23099	ZBTB43	zinc finger and BTB domain containing 43(ZBTB43)	Homo sapiens
29068	ZBTB44	zinc finger and BTB domain containing 44(ZBTB44)	Homo sapiens
84878	ZBTB45	zinc finger and BTB domain containing 45(ZBTB45)	Homo sapiens
140685	ZBTB46	zinc finger and BTB domain containing 46(ZBTB46)	Homo sapiens
3104	ZBTB48	zinc finger and BTB domain containing 48(ZBTB48)	Homo sapiens
166793	ZBTB49	zinc finger and BTB domain containing 49(ZBTB49)	Homo sapiens
9925	ZBTB5	zinc finger and BTB domain containing 5(ZBTB5)	Homo sapiens
10773	ZBTB6	zinc finger and BTB domain containing 6(ZBTB6)	Homo sapiens
51341	ZBTB7A	zinc finger and BTB domain containing 7A(ZBTB7A)	Homo sapiens
51043	ZBTB7B	zinc finger and BTB domain containing 7B(ZBTB7B)	Homo sapiens
201501	ZBTB7C	zinc finger and BTB domain containing 7C(ZBTB7C)	Homo sapiens
653121	ZBTB8A	zinc finger and BTB domain containing 8A(ZBTB8A)	Homo sapiens
221504	ZBTB9	zinc finger and BTB domain containing 9(ZBTB9)	Homo sapiens
60685	ZFAND3	zinc finger AN1-type containing 3(ZFAND3)	Homo sapiens
7763	ZFAND5	zinc finger AN1-type containing 5(ZFAND5)	Homo sapiens
54469	ZFAND6	zinc finger AN1-type containing 6(ZFAND6)	Homo sapiens
7541	ZBTB14 (ZFP161)	zinc finger and BTB domain containing 14(ZBTB14)	Homo sapiens
7542	ZFPL1	zinc finger protein like 1(ZFPL1)	Homo sapiens
7690	ZNF131	zinc finger protein 131(ZNF131)	Homo sapiens
10472	ZBTB18 (ZNF238)	zinc finger and BTB domain containing 18(ZBTB18)	Homo sapiens
49854	ZBTB21 (ZNF295)	zinc finger and BTB domain containing 21(ZBTB21)	Homo sapiens
90850	ZNF598	zinc finger protein 598(ZNF598)	Homo sapiens
158506	ZNF645	zinc finger protein 645(ZNF645)	Homo sapiens
84937	ZNRF1	zinc and ring finger 1(ZNRF1)	Homo sapiens
223082	ZNRF2	zinc and ring finger 2(ZNRF2)	Homo sapiens
84133	ZNRF3	zinc and ring finger 3(ZNRF3)	Homo sapiens
148066	ZNRF4	zinc and ring finger 4(ZNRF4)	Homo sapiens
151112	ZSWIM2	zinc finger SWIM-type containing 2(ZSWIM2)	Homo sapiens
PCs
5682	PSMA1	proteasome subunit alpha 1(PSMA1)	Homo sapiens
5683	PSMA2	proteasome subunit alpha 2(PSMA2)	Homo sapiens
5684	PSMA3	proteasome subunit alpha 3(PSMA3)	Homo sapiens
5685	PSMA4	proteasome subunit alpha 4(PSMA4)	Homo sapiens
5686	PSMA5	proteasome subunit alpha 5(PSMA5)	Homo sapiens
5687	PSMA6	proteasome subunit alpha 6(PSMA6)	Homo sapiens
5688	PSMA7	proteasome subunit alpha 7(PSMA7)	Homo sapiens
143471	PSMA8	proteasome subunit alpha 8(PSMA8)	Homo sapiens
5689	PSMB1	proteasome subunit beta 1(PSMB1)	Homo sapiens
5699	PSMB10	proteasome subunit beta 10(PSMB10)	Homo sapiens
122706	PSMB11	proteasome subunit beta 11(PSMB11)	Homo sapiens
5690	PSMB2	proteasome subunit beta 2(PSMB2)	Homo sapiens
5691	PSMB3	proteasome subunit beta 3(PSMB3)	Homo sapiens
5692	PSMB4	proteasome subunit beta 4(PSMB4)	Homo sapiens
5693	PSMB5	proteasome subunit beta 5(PSMB5)	Homo sapiens
5694	PSMB6	proteasome subunit beta 6(PSMB6)	Homo sapiens
5695	PSMB7	proteasome subunit beta 7(PSMB7)	Homo sapiens
5696	PSMB8	proteasome subunit beta 8(PSMB8)	Homo sapiens
5698	PSMB9	proteasome subunit beta 9(PSMB9)	Homo sapiens
5700	PSMC1	proteasome 26S subunit, ATPase 1(PSMC1)	Homo sapiens
5701	PSMC2	proteasome 26S subunit, ATPase 2(PSMC2)	Homo sapiens
5702	PSMC3	proteasome 26S subunit, ATPase 3(PSMC3)	Homo sapiens
29893	PSMC3IP	PSMC3 interacting protein(PSMC3IP)	Homo sapiens
5704	PSMC4	proteasome 26S subunit, ATPase 4(PSMC4)	Homo sapiens
5705	PSMC5	proteasome 26S subunit, ATPase 5(PSMC5)	Homo sapiens
5706	PSMC6	proteasome 26S subunit, ATPase 6(PSMC6)	Homo sapiens
5707	PSMD1	proteasome 26S subunit, non-ATPase 1(PSMD1)	Homo sapiens
5716	PSMD10	proteasome 26S subunit, non-ATPase 10(PSMD10)	Homo sapiens
5717	PSMD11	proteasome 26S subunit, non-ATPase 11(PSMD11)	Homo sapiens
5718	PSMD12	proteasome 26S subunit, non-ATPase 12(PSMD12)	Homo sapiens
5719	PSMD13	proteasome 26S subunit, non-ATPase 13(PSMD13)	Homo sapiens
10213	PSMD14	proteasome 26S subunit, non-ATPase 14(PSMD14)	Homo sapiens
5708	PSMD2	proteasome 26S subunit, non-ATPase 2(PSMD2)	Homo sapiens
5709	PSMD3	proteasome 26S subunit, non-ATPase 3(PSMD3)	Homo sapiens
5710	PSMD4	proteasome 26S subunit, non-ATPase 4(PSMD4)	Homo sapiens
5711	PSMD5	proteasome 26S subunit, non-ATPase 5(PSMD5)	Homo sapiens
9861	PSMD6	proteasome 26S subunit, non-ATPase 6(PSMD6)	Homo sapiens
5713	PSMD7	proteasome 26S subunit, non-ATPase 7(PSMD7)	Homo sapiens
5714	PSMD8	proteasome 26S subunit, non-ATPase 8(PSMD8)	Homo sapiens
5715	PSMD9	proteasome 26S subunit, non-ATPase 9(PSMD9)	Homo sapiens
5720	PSME1	proteasome activator subunit 1(PSME1)	Homo sapiens
5721	PSME2	proteasome activator subunit 2(PSME2)	Homo sapiens
10197	PSME3	proteasome activator subunit 3(PSME3)	Homo sapiens
23198	PSME4	proteasome activator subunit 4(PSME4)	Homo sapiens
9491	PSMF1	proteasome inhibitor subunit 1(PSMF1)	Homo sapiens
8624	PSMG1	proteasome assembly chaperone 1(PSMG1)	Homo sapiens
56984	PSMG2	proteasome assembly chaperone 2(PSMG2)	Homo sapiens
84262	PSMG3	proteasome assembly chaperone 3(PSMG3)	Homo sapiens
389362	PSMG4	proteasome assembly chaperone 4(PSMG4)	Homo sapiens
51371	POMP	proteasome maturation protein(POMP)	Homo sapiens
23392	KIAA0368	KIAA0368(KIAA0368)	Homo sapiens
11047	ADRM1	adhesion regulating molecule 1(ADRM1)	Homo sapiens
80227	PAAF1	proteasomal ATPase associated factor 1（PAAF1）	Homo sapiens
DUBs
4287	ATXN3	ataxin 3(ATXN3)	Homo sapiens
92552	ATXN3L	ataxin 3 like(ATXN3L)	Homo sapiens
8314	BAP1	BRCA1 associated protein 1(BAP1)	Homo sapiens
79184	BRCC3	BRCA1/BRCA2-containing complex subunit 3(BRCC3)	Homo sapiens
10987	COPS5	COP9 signalosome subunit 5(COPS5)	Homo sapiens
10980	COPS6	COP9 signalosome subunit 6(COPS6)	Homo sapiens
1540	CYLD	CYLD lysine 63 deubiquitinase(CYLD)	Homo sapiens
8665	EIF3F	eukaryotic translation initiation factor 3 subunit F(EIF3F)	Homo sapiens
8667	EIF3H	eukaryotic translation initiation factor 3 subunit H(EIF3H)	Homo sapiens
9929	JOSD1	Josephin domain containing 1(JOSD1)	Homo sapiens
126119	JOSD2	Josephin domain containing 2(JOSD2)	Homo sapiens
84954	MPND	MPN domain containing(MPND)	Homo sapiens
114803	MYSM1	Myb like, SWIRM and MPN domains 1(MYSM1)	Homo sapiens
55611	OTUB1	OTU deubiquitinase, ubiquitin aldehyde binding 1(OTUB1)	Homo sapiens
78990	OTUB2	OTU deubiquitinase, ubiquitin aldehyde binding 2(OTUB2)	Homo sapiens
220213	OTUD1	OTU deubiquitinase 1(OTUD1)	Homo sapiens
23252	OTUD3	OTU deubiquitinase 3(OTUD3)	Homo sapiens
54726	OTUD4	OTU deubiquitinase 4(OTUD4)	Homo sapiens
55593	OTUD5	OTU deubiquitinase 5(OTUD5)	Homo sapiens
139562	OTUD6A	OTU deubiquitinase 6A(OTUD6A)	Homo sapiens
51633	OTUD6B	OTU domain containing 6B(OTUD6B)	Homo sapiens
161725	OTUD7A	OTU deubiquitinase 7A(OTUD7A)	Homo sapiens
56957	OTUD7B	OTU deubiquitinase 7B(OTUD7B)	Homo sapiens
9924	PAN2	PAN2 poly(A) specific ribonuclease subunit	Homo sapiens
10594	PRPF8	pre-mRNA processing factor 8(PRPF8)	Homo sapiens
10213	PSMD14	proteasome 26S subunit, non-ATPase 14(PSMD14)	Homo sapiens
5713	PSMD7	proteasome 26S subunit, non-ATPase 7(PSMD7)	Homo sapiens
10617	STAMBP	STAM binding protein(STAMBP)	Homo sapiens
57559	STAMBPL1	STAM binding protein like 1(STAMBPL1)	Homo sapiens
7128	TNFAIP3	TNF alpha induced protein 3(TNFAIP3)	Homo sapiens
7345	UCHL1	ubiquitin C-terminal hydrolase L1(UCHL1)	Homo sapiens
7347	UCHL3	ubiquitin C-terminal hydrolase L3(UCHL3)	Homo sapiens
51377	UCHL5	ubiquitin C-terminal hydrolase L5(UCHL5)	Homo sapiens
7398	USP1	ubiquitin specific peptidase 1(USP1)	Homo sapiens
9100	USP10	ubiquitin specific peptidase 10(USP10)	Homo sapiens
8237	USP11	ubiquitin specific peptidase 11(USP11)	Homo sapiens
219333	USP12	ubiquitin specific peptidase 12(USP12)	Homo sapiens
8975	USP13	ubiquitin specific peptidase 13 (isopeptidase T-3)(USP13)	Homo sapiens
9097	USP14	ubiquitin specific peptidase 14(USP14)	Homo sapiens
9958	USP15	ubiquitin specific peptidase 15(USP15)	Homo sapiens
10600	USP16	ubiquitin specific peptidase 16(USP16)	Homo sapiens
391627	USP17	ubiquitin specific peptidase 17-like family member 9, pseudogene (USP17L9P)	Homo sapiens
377630	USP17L2	ubiquitin specific peptidase 17-like family member 2(USP17L2)	Homo sapiens
391622	USP17L6P	ubiquitin specific peptidase 17-like family member 6, pseudogene(USP17L6P)	Homo sapiens
11274	USP18	ubiquitin specific peptidase 18(USP18)	Homo sapiens
10869	USP19	ubiquitin specific peptidase 19(USP19)	Homo sapiens
9099	USP2	ubiquitin specific peptidase 2(USP2)	Homo sapiens
10868	USP20	ubiquitin specific peptidase 20(USP20)	Homo sapiens
27005	USP21	ubiquitin specific peptidase 21(USP21)	Homo sapiens
23326	USP22	ubiquitin specific peptidase 22(USP22)	Homo sapiens
23358	USP24	ubiquitin specific peptidase 24(USP24)	Homo sapiens
29761	USP25	ubiquitin specific peptidase 25(USP25)	Homo sapiens
83844	USP26	ubiquitin specific peptidase 26(USP26)	Homo sapiens
389856	USP27X	ubiquitin specific peptidase 27, X-linked(USP27X)	Homo sapiens
57646	USP28	ubiquitin specific peptidase 28(USP28)	Homo sapiens
57663	USP29	ubiquitin specific peptidase 29(USP29)	Homo sapiens
9960	USP3	ubiquitin specific peptidase 3(USP3)	Homo sapiens
84749	USP30	ubiquitin specific peptidase 30(USP30)	Homo sapiens
57478	USP31	ubiquitin specific peptidase 31(USP31)	Homo sapiens
84669	USP32	ubiquitin specific peptidase 32(USP32)	Homo sapiens
23032	USP33	ubiquitin specific peptidase 33(USP33)	Homo sapiens
9736	USP34	ubiquitin specific peptidase 34(USP34)	Homo sapiens
57558	USP35	ubiquitin specific peptidase 35(USP35)	Homo sapiens
57602	USP36	ubiquitin specific peptidase 36(USP36)	Homo sapiens
57695	USP37	ubiquitin specific peptidase 37(USP37)	Homo sapiens
84640	USP38	ubiquitin specific peptidase 38(USP38)	Homo sapiens
10713	USP39	ubiquitin specific peptidase 39(USP39)	Homo sapiens
7375	USP4	ubiquitin specific peptidase 4(USP4)	Homo sapiens
55230	USP40	ubiquitin specific peptidase 40(USP40)	Homo sapiens
84132	USP42	ubiquitin specific peptidase 42(USP42)	Homo sapiens
124739	USP43	ubiquitin specific peptidase 43(USP43)	Homo sapiens
84101	USP44	ubiquitin specific peptidase 44(USP44)	Homo sapiens
85015	USP45	ubiquitin specific peptidase 45(USP45)	Homo sapiens
64854	USP46	ubiquitin specific peptidase 46(USP46)	Homo sapiens
55031	USP47	ubiquitin specific peptidase 47(USP47)	Homo sapiens
84196	USP48	ubiquitin specific peptidase 48(USP48)	Homo sapiens
25862	USP49	ubiquitin specific peptidase 49(USP49)	Homo sapiens
8078	USP5	ubiquitin specific peptidase 5(USP5)	Homo sapiens
373509	USP50	ubiquitin specific peptidase 50(USP50)	Homo sapiens
158880	USP51	ubiquitin specific peptidase 51(USP51)	Homo sapiens
54532	USP53	ubiquitin specific peptidase 53(USP53)	Homo sapiens
159195	USP54	ubiquitin specific peptidase 54(USP54)	Homo sapiens
9098	USP6	ubiquitin specific peptidase 6(USP6)	Homo sapiens
9712	USP6NL	USP6 N-terminal like(USP6NL)	Homo sapiens
7874	USP7	ubiquitin specific peptidase 7(USP7)	Homo sapiens
9101	USP8	ubiquitin specific peptidase 8(USP8)	Homo sapiens
8239	USP9X	ubiquitin specific peptidase 9, X-linked(USP9X)	Homo sapiens
8287	USP9Y	ubiquitin specific peptidase 9, Y-linked(USP9Y)	Homo sapiens
10208	USPL1	ubiquitin specific peptidase like 1(USPL1)	Homo sapiens
80124	VCPIP1	valosin containing protein interacting protein 1(VCPIP1)	Homo sapiens
55432	YOD1	YOD1 deubiquitinase(YOD1)	Homo sapiens
54764	ZRANB1	zinc finger RANBP2-type containing 1 (ZRANB1)	Homo sapiens
