# Supplementary material for: Comprehensive analysis of ubiquitin-proteasome system genes related to prognosis and immunosuppression in head and neck squamous cell carcinoma
Source: Aging (Albany NY). 2021 Aug 16;13(16):20277–301. doi: 10.18632/aging.203411 (PMC8436932; doi:10.18632/aging.203411)
Supplement: Supplementary Table 2 [file aging-13-203411-s003.xlsx]

## Sheet: ST2-USExp-UPS genes
Supplementary Table 2. The 114 differentially expressed UPS-related genes (UPSGs) identified in HNSCC in the present study.
Gene	ConMean	TreatMean	logFC	pValue	FDR
UCHL1	2.38487	16.0393	2.74963	0.000159151	0.000174025
UBE2C	5.32405	34.1979	2.68331	1.08835e-22	1.27336e-20
PSMB9	5.50164	23.6832	2.10593	3.97862e-12	7.8898e-12
SOCS1	2.96451	10.4777	1.82146	7.09919e-18	6.38927e-17
UBE2T	4.38663	15.3587	1.80787	1.08451e-20	2.53776e-19
UBE2L6	15.3913	51.2827	1.73636	1.69356e-12	3.73987e-12
PSMD2	22.267	63.0289	1.50111	2.22727e-22	1.30295e-20
LGALS3BP	54.8423	149.737	1.44907	6.625e-13	1.61484e-12
USP18	2.82319	7.13487	1.33756	4.96792e-15	1.76135e-14
FBXO2	4.65518	11.589	1.31585	5.4056e-06	6.26193e-06
TNFAIP3	8.48166	21.0078	1.30851	7.7392e-09	1.06528e-08
DTX3L	7.47644	17.8326	1.25409	1.24707e-12	2.86093e-12
UHRF1	3.09467	6.9207	1.16113	1.82346e-18	1.9395e-17
PSMG3	8.71479	19.0642	1.12933	8.42242e-13	2.01107e-12
HLTF	3.57646	7.80263	1.12543	2.11461e-12	4.58166e-12
PSMB8	20.3698	44.3299	1.12184	5.62039e-08	7.3065e-08
PSMB7	33.7974	72.9113	1.10923	1.84638e-15	7.71522e-15
PSMB3	41.4043	88.6575	1.09846	1.89045e-14	5.82059e-14
PSME2	18.3056	38.7311	1.0812	2.17151e-09	3.13663e-09
PSMB2	13.3124	28.1546	1.0806	1.93833e-20	3.23979e-19
FBXL6	3.92611	8.28563	1.07751	7.70474e-19	9.01454e-18
TRAF2	4.88997	10.211	1.06223	1.35838e-11	2.48329e-11
PML	5.92549	12.2392	1.0465	3.24059e-12	6.53706e-12
SKP2	4.68412	9.62746	1.03938	3.19134e-14	9.10699e-14
SAE1	14.2478	29.0252	1.02657	1.93833e-20	3.23979e-19
KLHL5	3.96321	7.98633	1.01086	1.08153e-14	3.51499e-14
FBXO45	4.79151	9.64794	1.00974	1.03474e-15	4.65634e-15
PSMB4	38.3387	76.5158	0.996956	3.87725e-16	2.38757e-15
PSMB1	31.04	60.9819	0.97425	2.09992e-14	6.29976e-14
HERC5	3.16403	6.15854	0.960825	6.34772e-15	2.18436e-14
PSMA7	46.5142	90.0827	0.953579	5.16324e-16	2.87666e-15
TRIM28	33.4557	64.3677	0.944086	1.31674e-14	4.16375e-14
CPSF1	7.78555	14.9207	0.938445	4.65409e-18	4.53774e-17
PSMD3	15.7858	29.9833	0.925528	1.411e-19	2.06359e-18
CCNF	3.61543	6.8623	0.924524	1.34284e-17	1.04742e-16
JOSD1	9.7008	18.3925	0.922939	3.00271e-16	1.95176e-15
TRIM47	8.48025	16.0594	0.921242	1.38018e-09	2.07027e-09
IVNS1ABP	11.0245	20.7332	0.911227	1.46543e-09	2.17032e-09
UBE2Z	12.3644	22.533	0.865839	7.66865e-21	2.24308e-19
PSMD11	9.91248	18.0149	0.861871	1.06245e-17	8.87904e-17
TRIM21	7.95395	14.4306	0.859388	3.0834e-08	4.05346e-08
NACC1	10.154	18.3537	0.854022	3.88439e-15	1.42023e-14
RFWD3	4.91775	8.76495	0.833746	5.58966e-16	2.97268e-15
SHKBP1	9.92877	17.4283	0.811745	1.47954e-16	1.01827e-15
BIRC2	7.54141	13.1368	0.80071	2.79706e-05	3.17724e-05
MEX3D	5.11772	8.86642	0.79285	2.56535e-12	5.45719e-12
ADRM1	31.2314	53.8075	0.784811	1.73475e-15	7.51726e-15
RNF168	5.06686	8.71319	0.782109	2.33148e-09	3.32662e-09
PSMA3	14.1411	24.2923	0.780599	4.39236e-13	1.09342e-12
PSMA4	10.3384	17.6612	0.772568	2.36734e-14	6.92448e-14
PSMA1	10.3898	17.6438	0.76399	6.2455e-16	3.17706e-15
PSMG1	7.65361	12.9885	0.763021	3.49595e-13	8.89188e-13
RNF26	9.30671	15.7252	0.756738	1.11181e-11	2.06479e-11
RNF7	12.0374	20.2469	0.75017	1.7956e-11	3.23208e-11
USP14	8.22333	13.8255	0.749535	2.63699e-12	5.50943e-12
PSMB5	35.7285	59.6294	0.738949	4.75078e-12	9.11215e-12
FBXO6	6.57922	10.9695	0.737512	2.00106e-08	2.6605e-08
RBCK1	11.0402	18.3459	0.732693	1.69413e-12	3.73987e-12
PSMD13	14.3302	23.7811	0.730754	3.1529e-12	6.47173e-12
RNF213	5.09268	8.4489	0.730339	2.41579e-07	3.00689e-07
ZNF598	8.61987	14.187	0.718831	9.82992e-13	2.3002e-12
PSMD4	23.8673	39.2626	0.718117	3.30156e-13	8.58405e-13
TRIM22	7.61099	12.5139	0.717376	0.00749028	0.00796694
BFAR	6.74595	11.0664	0.714088	3.03434e-15	1.14522e-14
SIAH2	14.2188	23.2032	0.706526	3.80529e-06	4.45219e-06
PSMC4	21.1442	34.4977	0.706233	7.50864e-15	2.51003e-14
PCGF2	5.09467	8.30933	0.705744	1.31132e-13	3.56802e-13
KCTD17	3.69047	5.98491	0.697526	2.61099e-10	4.18474e-10
PSMC3	32.2291	52.2625	0.697411	5.90396e-12	1.11413e-11
TRAF7	15.3706	24.8306	0.691948	2.99489e-10	4.73517e-10
PSMC2	15.5994	25.1808	0.690828	6.54927e-16	3.19277e-15
RNF19B	15.1482	24.3904	0.687167	1.14032e-08	1.53353e-08
PSME1	52.0593	82.5755	0.665556	1.57681e-06	1.90192e-06
PCGF1	4.32733	6.83979	0.660477	1.90467e-19	2.47608e-18
BRCA1	2.72671	4.2748	0.648696	7.08821e-16	3.31728e-15
PRPF19	30.3592	47.496	0.645674	1.50094e-09	2.19513e-09
PSMC3IP	2.5143	3.9331	0.64551	5.8275e-21	2.24308e-19
TRIM65	5.08592	7.94978	0.644405	3.81498e-14	1.06274e-13
TNFAIP1	17.5512	27.3355	0.639211	1.01275e-10	1.71727e-10
RNF144A	3.34969	5.19021	0.631763	2.4223e-10	3.93624e-10
UBE2M	19.9474	30.7595	0.624828	2.96296e-11	5.17413e-11
USP1	7.57285	11.6766	0.624708	5.99686e-08	7.62644e-08
PSMD10	10.155	15.6511	0.624073	3.25464e-13	8.58405e-13
PSMD14	7.4822	11.5222	0.622875	1.40947e-16	1.01827e-15
SMURF1	6.53495	10.0263	0.617544	1.12746e-08	1.53353e-08
USP11	7.63605	11.7032	0.616009	6.75388e-05	7.45475e-05
UBE2V2	6.62132	10.0826	0.606679	2.76526e-15	1.07845e-14
USP39	8.91558	13.5736	0.606409	4.31863e-12	8.42134e-12
CBLC	15.4185	23.4688	0.606083	0.00493432	0.00529647
UBA6	5.92144	9.00966	0.605525	2.78327e-09	3.92264e-09
FBXO5	3.19365	4.84026	0.599878	5.08188e-16	2.87666e-15
OSTM1	4.72546	7.15883	0.599269	2.1895e-11	3.88139e-11
UBE2Q1	10.3008	15.5983	0.598636	2.51971e-15	1.01657e-14
USP5	19.4656	29.4084	0.595301	2.11036e-10	3.52732e-10
MSL2	5.20635	7.82929	0.588609	2.54357e-07	3.13261e-07
RNF145	15.6093	23.4732	0.588603	3.49906e-06	4.17744e-06
ANAPC11	9.71037	14.589	0.587284	5.80568e-08	7.46444e-08
ZBTB7B	25.3505	16.7261	-0.599912	3.63212e-06	4.29251e-06
KLHL33	3.37026	2.20547	-0.611777	3.02083e-07	3.68164e-07
USP54	6.12343	3.95145	-0.631959	3.60543e-11	6.20347e-11
ASB8	9.64056	6.21142	-0.634193	2.81625e-09	3.92264e-09
RNF141	13.2336	8.44956	-0.647254	1.29977e-09	1.97498e-09
ASB10	3.59082	2.19341	-0.711137	9.38145e-06	1.07611e-05
LNX1	5.73329	3.43054	-0.740929	2.36242e-10	3.893e-10
TRIM55	4.14815	2.35629	-0.815952	3.77397e-05	4.24572e-05
ZBTB7C	10.8998	6.16299	-0.8226	4.97451e-10	7.76023e-10
SOCS3	67.608	37.5723	-0.847523	0.0193675	0.0202321
USP2	6.55726	3.63326	-0.85183	7.09602e-10	1.09241e-09
TRIM72	5.02341	2.69315	-0.899369	0.0469125	0.0481471
KLHL38	4.35823	2.22213	-0.971797	0.00796308	0.00839352
ASB11	4.28676	2.14631	-0.998031	1.34785e-07	1.69568e-07
ASB5	6.9493	3.09025	-1.16914	5.34697e-05	5.95806e-05
TRIM54	12.0966	3.35854	-1.8487	0.0408803	0.0423274
TRIM63	14.1241	3.30012	-2.09756	0.00268787	0.00291186
