# Supplementary material for: Comprehensive analysis of ubiquitin-proteasome system genes related to prognosis and immunosuppression in head and neck squamous cell carcinoma
Source: Aging (Albany NY). 2021 Aug 16;13(16):20277–301. doi: 10.18632/aging.203411 (PMC8436932; doi:10.18632/aging.203411)
Supplement: Supplementary Table 3 [file aging-13-203411-s004.xlsx]

## Sheet: ST3-the top 20 l +h  GSEA
Supplementary Table 3. The top 20 enriched pathways of GSEA in the high-risk and low-risk groups.
NAME	SIZE	NES	ES	NOM p-val	FDR q-val
KEGG_GLYCOSAMINOGLYCAN_BIOSYNTHESIS_CHONDROITIN_SULFATE	22	2.09924	0.81287	0	0.00955789
KEGG_ECM_RECEPTOR_INTERACTION	84	1.90344	0.676165	0.010101	0.0611294
KEGG_GLYCOSPHINGOLIPID_BIOSYNTHESIS_GANGLIO_SERIES	15	1.88943	0.742546	0.00200401	0.0461868
KEGG_HYPERTROPHIC_CARDIOMYOPATHY_HCM	83	1.86053	0.621055	0.00619835	0.0441324
KEGG_OTHER_GLYCAN_DEGRADATION	16	1.8538	0.704559	0.00614754	0.0381165
KEGG_FOCAL_ADHESION	199	1.8131	0.556315	0.0183673	0.0453783
KEGG_GLYCOSAMINOGLYCAN_BIOSYNTHESIS_KERATAN_SULFATE	15	1.80061	0.682849	0.00400802	0.0445334
KEGG_ARRHYTHMOGENIC_RIGHT_VENTRICULAR_CARDIOMYOPATHY_ARVC	74	1.76407	0.557793	0.0143149	0.0545691
KEGG_GLYCOSAMINOGLYCAN_DEGRADATION	21	1.7585	0.586859	0.00813008	0.0516467
KEGG_DILATED_CARDIOMYOPATHY	90	1.7502	0.578339	0.0273109	0.0502338
KEGG_LYSOSOME	121	1.74553	0.495404	0.0183673	0.0473772
KEGG_GLYCOSAMINOGLYCAN_BIOSYNTHESIS_HEPARAN_SULFATE	26	1.7195	0.562729	0.0104384	0.053659
KEGG_VIBRIO_CHOLERAE_INFECTION	54	1.71435	0.4617	0.010142	0.0519399
KEGG_PROTEASOME	46	1.63398	0.585058	0.0470498	0.12047
KEGG_PROTEIN_EXPORT	24	1.57104	0.575214	0.0545455	0.121563
KEGG_REGULATION_OF_ACTIN_CYTOSKELETON	213	1.45965	0.389451	0.0640496	0.214926
KEGG_AMINO_SUGAR_AND_NUCLEOTIDE_SUGAR_METABOLISM	43	1.3829	0.392387	0.0828625	0.290453
KEGG_N_GLYCAN_BIOSYNTHESIS	46	1.33561	0.433375	0.153374	0.337829
KEGG_BASAL_CELL_CARCINOMA	55	1.32352	0.415143	0.14898	0.334916
KEGG_SNARE_INTERACTIONS_IN_VESICULAR_TRANSPORT	38	1.31423	0.395861	0.132554	0.332264
KEGG_DNA_REPLICATION	36	-1.97142	-0.810376	0	0.142544
KEGG_MISMATCH_REPAIR	23	-1.96051	-0.796412	0.00412371	0.0810432
KEGG_PRIMARY_IMMUNODEFICIENCY	35	-1.91842	-0.764459	0.00616016	0.0860161
KEGG_T_CELL_RECEPTOR_SIGNALING_PATHWAY	108	-1.91727	-0.559401	0.00394477	0.0649664
KEGG_PANTOTHENATE_AND_COA_BIOSYNTHESIS	16	-1.84075	-0.668782	0.00193424	0.126133
KEGG_HOMOLOGOUS_RECOMBINATION	28	-1.80314	-0.689608	0.0162602	0.147972
KEGG_CYSTEINE_AND_METHIONINE_METABOLISM	34	-1.7915	-0.552236	0.0121212	0.137014
KEGG_FC_EPSILON_RI_SIGNALING_PATHWAY	79	-1.77268	-0.487923	0.00796813	0.140723
KEGG_CELL_CYCLE	124	-1.75782	-0.551224	0.0308008	0.143245
KEGG_ASTHMA	28	-1.74132	-0.712341	0.0322581	0.148974
KEGG_ALPHA_LINOLENIC_ACID_METABOLISM	19	-1.72573	-0.609789	0.00990099	0.1529
KEGG_LINOLEIC_ACID_METABOLISM	29	-1.71215	-0.564794	0.0178218	0.154963
KEGG_TYPE_I_DIABETES_MELLITUS	41	-1.70918	-0.672554	0.0468432	0.14627
KEGG_AUTOIMMUNE_THYROID_DISEASE	50	-1.70573	-0.614079	0.0438247	0.138269
KEGG_NATURAL_KILLER_CELL_MEDIATED_CYTOTOXICITY	132	-1.67722	-0.482324	0.0337302	0.161306
KEGG_BASE_EXCISION_REPAIR	35	-1.67636	-0.61971	0.044898	0.152158
KEGG_ARACHIDONIC_ACID_METABOLISM	58	-1.66714	-0.47615	0.0141414	0.152314
KEGG_FATTY_ACID_METABOLISM	42	-1.6603	-0.527375	0.0281125	0.150812
KEGG_LYSINE_DEGRADATION	44	-1.65546	-0.533341	0.0242915	0.1485
KEGG_SELENOAMINO_ACID_METABOLISM	25	-1.64972	-0.583152	0.0181818	0.146194
