# Supplementary material for: Comprehensive analysis of ubiquitin-proteasome system genes related to prognosis and immunosuppression in head and neck squamous cell carcinoma
Source: Aging (Albany NY). 2021 Aug 16;13(16):20277–301. doi: 10.18632/aging.203411 (PMC8436932; doi:10.18632/aging.203411)
Supplement: Supplementary Table 4 [file aging-13-203411-s005.xlsx]

## Sheet: ST4-imformation of training set
Supplementary Table 4. The HNSCC patients of the TCGA training set.
ID	Age	Sex	OSmonths	OSstatus	Grade	Stage	T	N	M
TCGA-CV-7421	76	Male	0.07	Dead	G2	Stage IV	T4	N0	M0
TCGA-HD-A4C1	41	Female	0.36	Alive	G1	Stage IV	T3	N2	M0
TCGA-CV-7414	78	Male	0.46	Dead	G2	Stage III	T3	N1	M0
TCGA-CV-7102	76	Female	1.84	Dead	G3	Stage III	T3	N1	M0
TCGA-P3-A6T4	54	Male	2.04	Dead	G2	Stage IV	T4	N1	M0
TCGA-CV-6934	66	Female	2.14	Dead	G2	Stage IV	T3	N2	M0
TCGA-BA-A6DG	49	Male	2.27	Dead	G2	Stage IV	T4	N2	M0
TCGA-CV-6961	61	Male	2.5	Dead	G3	Stage II	T2	N0	M0
TCGA-D6-6824	61	Male	2.53	Alive	G2	Stage IV	T4	N1	M0
TCGA-CN-A642	57	Male	2.69	Dead	G3	Stage IV	T3	N2	M0
TCGA-CQ-5326	67	Male	2.92	Dead	G3	Stage IV	T4	N2	M0
TCGA-F7-A50I	72	Male	3.02	Alive	G2	NA	NA	NA	NA
TCGA-4P-AA8J	66	Male	3.35	Alive	G2	Stage IV	T4	N2	M0
TCGA-CV-7429	55	Male	3.52	Dead	G3	Stage III	T3	N0	M0
TCGA-BA-6871	75	Male	3.55	Dead	G2	Stage IV	T3	N2	M0
TCGA-HD-A6HZ	79	Female	3.65	Alive	G2	Stage II	T2	N0	M0
TCGA-BA-6873	28	Male	4.01	Alive	G2	Stage IV	T2	N2	M0
TCGA-CV-6962	65	Male	4.14	Dead	G2	Stage III	T3	N0	M0
TCGA-CQ-6227	77	Male	4.24	Dead	G2	Stage III	T3	N1	M0
TCGA-CV-7236	77	Female	4.73	Dead	G3	Stage IV	T2	N2	M0
TCGA-CV-7252	62	Female	4.96	Dead	G2	Stage III	T3	N0	M0
TCGA-CR-7398	53	Female	5.12	Alive	G2	Stage II	T2	N0	M0
TCGA-CV-7101	80	Male	5.26	Dead	G2	Stage II	T2	N0	M0
TCGA-BA-A6DD	44	Male	5.68	Dead	G2	Stage IV	T4	N2	M0
TCGA-CR-7399	60	Female	5.95	Alive	G3	Stage IV	T4	N2	M0
TCGA-CR-6478	66	Female	6.01	Dead	G3	Stage IV	T3	N2	M0
TCGA-BB-4217	68	Male	6.14	Alive	G3	Stage IV	T4	N2	M0
TCGA-C9-A47Z	72	Female	6.27	Dead	G1	Stage III	T2	N1	M0
TCGA-CV-7438	87	Female	6.37	Dead	G3	Stage II	T2	N0	M0
TCGA-CV-A6JM	85	Male	6.37	Dead	G2	Stage IV	T4	N0	M0
TCGA-CV-A6JO	69	Male	6.47	Dead	G2	Stage IV	T4	N2	M0
TCGA-T2-A6WX	73	Female	6.87	Dead	G1	Stage III	T3	N0	M0
TCGA-HD-A6I0	56	Male	6.9	Alive	G1	Stage III	T3	NX	M0
TCGA-CV-A465	24	Male	7.06	Dead	G1	Stage II	T2	N0	M0
TCGA-T2-A6X0	49	Male	7.1	Alive	G2	Stage IV	T1	N2	M0
TCGA-CV-6956	67	Male	7.13	Dead	G2	Stage IV	T4	N2	M0
TCGA-MZ-A5BI	53	Male	7.13	Dead	NA	Stage IV	T2	N2	M0
TCGA-CN-A63T	60	Male	7.39	Alive	G3	Stage IV	T3	N2	M0
TCGA-D6-A6EM	65	Female	7.62	Alive	G2	Stage III	T2	N1	M0
TCGA-CV-6959	48	Male	8.41	Dead	G2	Stage III	T3	N1	M0
TCGA-CN-5370	78	Male	8.51	Dead	G3	Stage II	T2	N0	M0
TCGA-BB-A6UO	61	Female	8.8	Dead	G2	Stage IV	T3	N2	MX
TCGA-CN-6022	49	Male	9.23	Dead	G3	Stage IV	T4	N1	M0
TCGA-CV-6441	60	Male	9.59	Dead	G3	Stage III	T3	N0	M0
TCGA-D6-6517	59	Male	9.59	Alive	G2	Stage III	T3	N0	M0
TCGA-CV-7413	74	Female	9.66	Dead	G2	Stage II	T2	N0	M0
TCGA-CV-6955	74	Female	10.97	Dead	G3	Stage II	T2	N0	M0
TCGA-BA-A6DI	62	Male	11.04	Dead	G2	Stage III	T3	N0	M0
TCGA-CR-6482	62	Male	11.33	Alive	G3	Stage IV	T2	N2	M0
TCGA-D6-6826	64	Female	11.43	Dead	G2	Stage IV	T4	N2	M0
TCGA-BA-A6DA	41	Female	11.53	Alive	G2	Stage IV	T4	N2	M0
TCGA-CN-5365	38	Male	11.53	Dead	G2	Stage IV	T1	N2	M1
TCGA-CR-6484	67	Female	11.63	Alive	G2	Stage IV	T4	N0	M0
TCGA-CN-6998	53	Male	11.73	Dead	G2	Stage IV	T4	N1	M0
TCGA-F7-A622	75	Male	11.79	Dead	G1	NA	TX	NX	MX
TCGA-IQ-A61G	57	Male	11.83	Alive	G2	Stage IV	T4	N2	MX
TCGA-D6-A6EQ	57	Male	12.09	Alive	G3	Stage IV	T4	N1	M0
TCGA-QK-A8ZA	60	Male	12.19	Dead	G2	Stage IV	T2	N2	MX
TCGA-CN-A63W	48	Female	12.39	Dead	G2	Stage IV	T4	N2	M0
TCGA-CN-5359	59	Male	12.39	Dead	G2	Stage IV	T4	N1	M0
TCGA-F7-A624	73	Male	12.42	Alive	G3	NA	TX	NX	MX
TCGA-MT-A67F	60	Female	12.61	Alive	G2	Stage IV	T4	N0	MX
TCGA-BA-6872	47	Male	12.61	Dead	G2	Stage IV	T3	N2	M0
TCGA-C9-A480	45	Female	12.68	Alive	G1	Stage III	T3	N0	M0
TCGA-RS-A6TO	82	Female	12.71	Dead	G2	Stage IV	T4	N2	M0
TCGA-QK-A6IJ	71	Male	12.71	Alive	G3	Stage II	T2	N0	M0
TCGA-CV-7104	61	Female	12.91	Dead	G2	Stage IV	T2	N2	M0
TCGA-P3-A6T6	53	Male	12.98	Dead	G3	Stage IV	T4	N0	M0
TCGA-CN-4742	48	Female	13.04	Dead	G3	Stage IV	T4	N1	M0
TCGA-P3-A6T8	54	Male	13.14	Alive	G3	Stage IV	T4	N0	M0
TCGA-CQ-6225	65	Male	13.24	Dead	G2	Stage II	T2	N0	M0
TCGA-TN-A7HJ	51	Male	13.24	Alive	G2	Stage III	T3	NX	M0
TCGA-KU-A66S	69	Female	13.34	Dead	G2	Stage III	T2	N1	MX
TCGA-CV-5970	59	Male	13.34	Dead	G2	Stage IV	T4	N2	M0
TCGA-TN-A7HI	56	Male	13.53	Alive	G3	Stage I	T1	N0	M0
TCGA-BA-4076	39	Male	13.63	Dead	G2	Stage IV	T3	N2	M0
TCGA-HD-A633	74	Male	13.83	Alive	G2	Stage IV	T4	N0	M0
TCGA-IQ-A61O	43	Male	13.83	Dead	GX	Stage IV	T2	N2	MX
TCGA-D6-A6EP	62	Male	13.93	Alive	G3	Stage III	T3	N0	M0
TCGA-DQ-7588	66	Male	14.03	Dead	G3	Stage III	T2	N1	M0
TCGA-CQ-A4CG	78	Female	14.13	Dead	G2	Stage II	T2	N0	M0
TCGA-CN-4738	53	Male	14.32	Dead	G2	Stage IV	T4	N0	M0
TCGA-MT-A51W	52	Female	14.36	Alive	G2	Stage I	T1	NX	M0
TCGA-IQ-7632	68	Female	14.49	Alive	G1	Stage IV	T4	N0	M0
TCGA-CQ-6228	71	Female	14.98	Dead	G2	Stage III	T2	N1	M0
TCGA-H7-8502	50	Male	15.05	Alive	G2	Stage IV	T4	N2	M0
TCGA-CV-6950	64	Male	15.08	Dead	G2	Stage IV	T3	N2	M0
TCGA-IQ-A6SH	55	Male	15.47	Alive	G1	Stage IV	T2	N1	M1
TCGA-BA-6868	53	Male	15.51	Dead	G2	Stage IV	T3	N3	M0
TCGA-CQ-6219	50	Female	15.74	Dead	G2	Stage IV	T3	N2	M0
TCGA-CR-6492	78	Male	15.74	Alive	G3	Stage IV	T4	N1	M0
TCGA-P3-A5Q6	49	Male	15.77	Dead	G3	Stage III	T3	N0	M0
TCGA-T2-A6WZ	53	Male	15.9	Dead	G2	Stage IV	T3	N2	M0
TCGA-IQ-7630	49	Male	15.93	Alive	G3	Stage III	T3	N0	M0
TCGA-D6-6825	73	Male	16.13	Alive	G2	Stage III	T3	N0	M0
TCGA-CN-5364	55	Male	16.2	Dead	G2	Stage IV	T4	N2	M0
TCGA-CV-7430	56	Male	16.26	Dead	G2	Stage III	T3	N0	M0
TCGA-BA-A8YP	50	Male	16.39	Alive	G2	Stage IV	T4	N3	M0
TCGA-UP-A6WW	58	Male	17.02	Alive	G2	Stage IV	T2	N2	MX
TCGA-QK-A8ZB	68	Male	17.81	Alive	G2	Stage IV	T4	N0	M0
TCGA-CV-5966	63	Female	17.9	Dead	G3	Stage IV	T4	N1	M0
TCGA-CV-5439	62	Male	17.94	Dead	G2	Stage II	T2	N0	M0
TCGA-MZ-A7D7	51	Male	17.97	Alive	NA	Stage IV	T3	N2	M0
TCGA-DQ-5631	52	Male	18	Dead	G3	Stage IV	T3	N2	M0
TCGA-UF-A7JJ	68	Male	18.04	Alive	G1	Stage IV	T4	N0	M0
TCGA-KU-A66T	53	Female	18.13	Alive	G2	Stage IV	T4	N0	M0
TCGA-BB-4228	50	Male	18.36	Alive	GX	Stage II	T2	N0	M0
TCGA-CV-7263	64	Male	18.4	Dead	G1	Stage II	T2	NX	M0
TCGA-D6-6827	55	Female	18.66	Alive	G3	Stage III	T1	N1	M0
TCGA-CV-7095	87	Female	18.79	Dead	G2	Stage IV	T1	N2	M0
TCGA-F7-A61S	62	Male	18.92	Alive	G1	NA	TX	NX	MX
TCGA-IQ-A6SG	61	Female	19.02	Alive	G2	Stage III	T3	N0	M0
TCGA-CN-6018	85	Female	19.05	Dead	G2	Stage IV	T4	N2	M0
TCGA-CN-A6V7	40	Male	19.51	Alive	GX	Stage IV	T2	N2	M0
TCGA-CV-7433	49	Male	19.74	Dead	G3	Stage IV	T4	N1	M0
TCGA-CV-6943	74	Male	19.78	Dead	G2	Stage III	T3	N0	M0
TCGA-CV-A6K0	58	Male	19.91	Alive	G3	Stage II	T2	N0	M0
TCGA-F7-A623	70	Male	20.24	Alive	G1	NA	TX	NX	MX
TCGA-DQ-7591	62	Male	20.43	Alive	G4	Stage IV	T4	N2	M0
TCGA-BA-A6DL	59	Male	20.47	Alive	G2	Stage III	T3	N0	M0
TCGA-BB-8601	84	Male	20.5	Alive	G2	Stage II	T2	N0	M0
TCGA-CN-A6V6	59	Male	20.86	Alive	GX	Stage IV	T2	N2	M0
TCGA-QK-A64Z	79	Female	21.06	Dead	G1	Stage II	T2	N0	M0
TCGA-CV-6433	57	Male	21.06	Alive	G3	Stage II	T2	N0	M0
TCGA-BA-6869	62	Male	21.16	Alive	G2	Stage III	T3	N0	M0
TCGA-QK-A652	60	Male	21.19	Alive	G2	Stage II	T2	N0	M0
TCGA-CV-A6JY	69	Male	21.22	Alive	G1	Stage IV	T4	N0	M0
TCGA-F7-8489	48	Male	21.62	Alive	G1	Stage II	T2	N0	M0
TCGA-HD-8314	58	Male	22.01	Alive	G4	Stage III	T1	N1	M0
TCGA-CN-A63V	59	Male	22.31	Alive	G2	Stage IV	T4	N0	M0
TCGA-UF-A7JS	59	Male	22.34	Dead	G2	Stage IV	T3	N2	M0
TCGA-CV-A6K1	65	Male	22.5	Alive	G2	Stage IV	T4	N0	M0
TCGA-CR-6491	60	Male	22.77	Alive	G2	Stage IV	T4	NX	M0
TCGA-CV-5971	60	Male	23.03	Alive	G2	Stage IV	T2	N2	M0
TCGA-D6-6823	50	Male	23.03	Alive	G2	Stage III	T3	N1	M0
TCGA-QK-A6IF	61	Male	23.13	Alive	GX	Stage IV	T1	N2	M0
TCGA-D6-A74Q	67	Male	23.32	Alive	G3	Stage IV	T4	N0	M0
TCGA-CN-A6UY	57	Male	23.42	Alive	G2	Stage IV	T3	N2	M0
TCGA-CV-A6JZ	68	Male	23.46	Alive	G2	Stage IV	T4	N0	M0
TCGA-CN-A499	60	Female	23.55	Alive	G2	Stage I	T1	N0	M0
TCGA-D6-8568	62	Male	24.93	Alive	G2	Stage II	T2	N0	M0
TCGA-D6-A6EO	44	Male	24.93	Alive	G2	Stage IV	T4	N0	M0
TCGA-CN-A498	61	Female	25.39	Dead	G1	Stage II	T2	N0	M0
TCGA-D6-6516	69	Male	25.39	Alive	G2	Stage III	T1	N1	M0
TCGA-BB-A5HU	47	Male	25.69	Alive	G2	Stage IV	T4	N2	M0
TCGA-HD-7754	69	Male	25.72	Alive	G1	Stage IV	T2	N2	M0
TCGA-CR-7382	49	Male	26.15	Alive	G2	Stage IV	T2	N2	M0
TCGA-CV-7245	62	Male	26.18	Alive	G2	Stage III	T3	N0	M0
TCGA-CV-6940	80	Female	26.41	Dead	G2	Stage I	T1	N0	M0
TCGA-CR-7388	70	Female	27.04	Dead	G2	Stage IV	T2	N2	M0
TCGA-BB-A5HZ	65	Male	27.17	Alive	G2	Stage IV	T4	N1	M0
TCGA-BA-A6D8	59	Male	27.92	Alive	G2	Stage IV	T4	N2	M0
TCGA-CV-A45O	57	Male	27.96	Alive	G2	Stage III	T3	N0	M0
TCGA-CV-A6JT	65	Male	27.99	Alive	G2	Stage II	T2	N0	M0
TCGA-BA-A4IG	77	Male	28.09	Alive	G3	Stage IV	T2	N2	M0
TCGA-HD-7753	62	Male	28.45	Alive	G2	Stage II	T2	N0	M0
TCGA-P3-A6T5	79	Female	28.98	Dead	G2	Stage IV	T4	N0	M0
TCGA-CR-7373	66	Male	29.2	Alive	G2	Stage IV	T4	N2	M0
TCGA-UF-A7JH	59	Male	29.43	Alive	G1	Stage IV	T4	N0	M0
TCGA-CV-A6JN	53	Male	29.76	Alive	G1	Stage II	T2	N0	M0
TCGA-P3-A5Q5	54	Male	29.89	Alive	G3	Stage IV	TX	N2	M0
TCGA-CR-7402	68	Male	29.93	Alive	G2	Stage III	T3	N0	M0
TCGA-MT-A67A	85	Female	30.03	Alive	G2	Stage I	T1	N0	M0
TCGA-CV-6951	57	Male	30.06	Dead	G2	Stage IV	T4	N2	M0
TCGA-CV-7568	48	Female	30.45	Dead	GX	Stage IV	T4	N0	M0
TCGA-CR-7395	80	Female	30.55	Alive	G2	Stage II	T2	N0	M0
TCGA-CN-6011	57	Male	30.65	Alive	G3	Stage IV	T4	N0	M0
TCGA-CQ-A4CI	73	Male	31.21	Alive	G3	NA	TX	NX	MX
TCGA-CN-A63U	50	Male	31.67	Alive	G3	Stage III	T3	N0	M0
TCGA-CR-7376	83	Male	31.93	Alive	G2	Stage II	T2	N0	M0
TCGA-CN-6989	64	Male	32.19	Dead	G2	Stage IV	T3	N2	M0
TCGA-CQ-6220	69	Male	32.36	Dead	G2	Stage III	T2	N1	M0
TCGA-CN-6997	66	Male	32.46	Dead	G3	Stage IV	T4	N2	M0
TCGA-CR-7393	26	Male	32.62	Alive	G2	Stage I	T1	N0	M0
TCGA-F7-8298	58	Male	32.69	Alive	G1	Stage I	T1	N0	M0
TCGA-CN-4731	63	Female	32.79	Dead	G3	Stage IV	T4	N2	M0
TCGA-CQ-6221	79	Male	32.85	Alive	G3	Stage II	T2	N0	M0
TCGA-CQ-A4CD	69	Male	33.57	Alive	G3	Stage IV	T4	N0	M0
TCGA-HD-7229	60	Male	33.74	Alive	G3	Stage IV	T4	NX	M0
TCGA-DQ-5630	73	Male	33.84	Alive	G2	Stage III	T3	N1	M0
TCGA-CR-7379	78	Female	34.03	Alive	G2	Stage IV	T4	N2	M0
TCGA-CV-7422	60	Female	34.07	Dead	G3	Stage IV	T4	N1	M0
TCGA-CN-6019	61	Male	34.1	Alive	G2	Stage IV	T4	N0	M0
TCGA-CX-7219	47	Male	34.33	Alive	G2	Stage IV	T4	N2	M0
TCGA-HL-7533	65	Male	34.72	Alive	G3	Stage IV	T2	N2	M0
TCGA-CN-A497	63	Male	34.99	Alive	G2	Stage IV	T2	N2	M0
TCGA-CR-7369	59	Male	35.81	Dead	G2	Stage IV	T4	N0	M0
TCGA-CV-7446	66	Male	35.91	Dead	G2	Stage II	T2	N0	M0
TCGA-CV-7242	60	Female	35.97	Alive	G2	Stage III	T3	N0	M0
TCGA-P3-A6SW	50	Male	36.79	Alive	G3	Stage IV	T4	N2	M0
TCGA-CR-6473	68	Male	36.96	Alive	G3	Stage IV	T3	N2	M0
TCGA-DQ-5625	52	Female	37.22	Dead	G2	Stage II	T2	N0	M0
TCGA-IQ-A61H	76	Male	37.39	Alive	G2	Stage II	T2	N0	MX
TCGA-DQ-7592	57	Male	37.55	Alive	G2	Stage IV	T4	N2	M0
TCGA-CR-5249	35	Female	37.84	Alive	GX	Stage II	T2	N0	M0
TCGA-IQ-7631	60	Female	38.5	Alive	G1	Stage II	T2	N0	M0
TCGA-CQ-6229	61	Male	38.73	Alive	G2	Stage III	T2	N1	M0
TCGA-CR-7365	60	Male	39.13	Alive	G2	Stage IV	T4	N2	M0
TCGA-CR-6471	58	Male	39.49	Dead	G2	Stage IV	T4	N0	M0
TCGA-CQ-6218	52	Female	41.16	Alive	G2	Stage III	T3	N0	M0
TCGA-CN-5355	64	Male	41.98	Alive	G2	Stage IV	T4	N0	M0
TCGA-CQ-7071	76	Female	43.07	Alive	G2	Stage IV	T4	N1	M0
TCGA-CQ-A4C6	63	Male	44.45	Alive	G2	Stage II	T2	N0	M0
TCGA-CN-4739	71	Male	45.8	Dead	G2	Stage IV	T4	N0	M0
TCGA-CN-5356	56	Male	46.29	Alive	G2	Stage III	T3	N0	M0
TCGA-CR-7392	67	Female	46.81	Alive	G1	Stage IV	T3	N2	M0
TCGA-CR-7367	52	Male	47.31	Alive	G1	Stage IV	T4	N3	M0
TCGA-CV-A45Z	75	Male	48.16	Dead	G3	Stage II	T2	N0	M0
TCGA-CX-A4AQ	56	Male	51.08	Alive	G3	Stage IV	T1	N2	M0
TCGA-P3-A5QE	49	Male	51.22	Alive	G2	Stage III	T1	N1	M0
TCGA-CN-4727	56	Male	51.25	Alive	G2	Stage IV	T4	N0	M0
TCGA-CN-5373	55	Female	52.04	Alive	G1	Stage II	T2	N0	M0
TCGA-CN-6023	73	Male	52.04	Alive	GX	Stage IV	T4	N0	M0
TCGA-CV-7103	49	Male	52.27	Dead	G2	Stage II	T2	N0	M0
TCGA-CQ-5324	59	Male	52.33	Alive	G2	Stage IV	T3	N2	M0
TCGA-CQ-7065	40	Male	53.48	Alive	G2	Stage II	T2	N0	M0
TCGA-CV-6953	80	Female	53.91	Dead	G1	Stage III	T3	N0	M0
TCGA-CR-5248	53	Male	54.63	Alive	G3	Stage IV	T4	N2	M0
TCGA-UF-A719	54	Male	54.63	Alive	G1	Stage III	T3	N0	M0
TCGA-CQ-6224	52	Male	56.54	Alive	G3	Stage II	T2	N0	M0
TCGA-CV-A464	48	Male	56.57	Alive	G2	Stage IV	T4	N0	M0
TCGA-CN-5374	56	Female	56.9	Dead	G3	Stage IV	T2	N2	M0
TCGA-CV-7406	49	Male	57.42	Dead	GX	Stage II	T2	N0	M0
TCGA-BA-5153	51	Male	57.88	Dead	G2	Stage III	T2	N1	M0
TCGA-CR-6467	59	Male	58.38	Alive	G3	Stage IV	T2	N2	M0
TCGA-CV-A460	72	Male	60.38	Dead	G3	Stage IV	T3	N2	M0
TCGA-CV-5977	66	Male	60.45	Alive	G2	Stage III	T3	N1	M0
TCGA-BA-5558	65	Male	65.54	Alive	G1	Stage IV	T4	N1	M0
TCGA-CV-6954	59	Male	65.77	Dead	G2	Stage IV	T4	N1	M0
TCGA-CV-7178	64	Female	71.16	Dead	G3	Stage IV	T4	N1	M0
TCGA-CN-5360	68	Male	71.25	Alive	G2	Stage IV	T4	N0	M0
TCGA-P3-A5QA	41	Male	71.68	Alive	G3	Stage II	T2	N0	M0
TCGA-CV-5435	57	Male	76.18	Dead	G3	Stage IV	T4	N0	M0
TCGA-CV-5442	76	Female	76.45	Alive	G3	Stage IV	T4	N2	M0
TCGA-CQ-7072	51	Male	77.5	Alive	G3	Stage IV	T4	N0	M0
TCGA-CR-5243	51	Male	84.17	Alive	G3	Stage IV	T3	N2	M0
TCGA-CV-7432	79	Male	84.43	Dead	G1	Stage III	T2	N1	M0
TCGA-CV-7238	69	Female	89.59	Alive	G2	Stage II	T2	N0	M0
TCGA-CV-6933	53	Male	90.05	Dead	G2	Stage IV	T4	N0	M0
TCGA-BB-4223	48	Male	105.81	Alive	G3	Stage IV	T3	N2	M0
TCGA-CV-5440	52	Male	107.42	Alive	G3	Stage IV	T4	N2	M0
TCGA-CV-5434	60	Male	108.87	Dead	G2	Stage IV	T4	N1	M0
TCGA-CV-5432	68	Male	129.11	Alive	G3	Stage III	T3	N0	M0
TCGA-CV-7183	53	Male	130.78	Alive	G1	Stage II	T2	N0	M0
TCGA-CV-5430	61	Male	139.32	Alive	G3	Stage IV	T4	N2	M0
TCGA-CV-6942	73	Female	140.67	Alive	G3	Stage II	T2	N0	M0
TCGA-CV-7435	57	Female	153.75	Dead	G2	Stage IV	T4	N1	M0
TCGA-CV-A45Q	69	Female	169.25	Dead	G1	Stage IV	T4	N1	M0
TCGA-CV-7090	39	Male	172.54	Alive	G2	Stage II	T2	N0	M0
