# Supplementary material for: Comprehensive analysis of ubiquitin-proteasome system genes related to prognosis and immunosuppression in head and neck squamous cell carcinoma
Source: Aging (Albany NY). 2021 Aug 16;13(16):20277–301. doi: 10.18632/aging.203411 (PMC8436932; doi:10.18632/aging.203411)
Supplement: Supplementary Table 5 [file aging-13-203411-s006.xlsx]

## Sheet: ST5-imformation of test set
Supplementary Table 5. The HNSCC patients of the TCGA test set.
ID	Age	Sex	OSmonths	OSstatus	Grade	Stage	T	N	M
TCGA-IQ-A61I	63	Male	0.07	Dead	G3	Stage IV	T1	N2	M0
TCGA-CX-7082	82	Male	0.36	Dead	G2	Stage II	T2	N0	M0
TCGA-F7-A61W	51	Male	0.46	Alive	G2	NA	TX	NX	MX
TCGA-CV-A463	82	Female	0.76	Dead	G2	Stage IV	T4	N0	M0
TCGA-CR-7374	67	Female	0.99	Alive	G2	Stage II	T2	N0	M0
TCGA-CV-A45V	87	Female	1.05	Dead	G1	Stage IV	T4	N0	M0
TCGA-MT-A67D	55	Male	1.84	Alive	G2	Stage II	T2	N0	M0
TCGA-CV-7255	32	Female	2.1	Dead	G2	Stage II	T2	N0	M0
TCGA-UF-A71A	67	Male	2.83	Dead	G1	Stage IV	T3	N2	M0
TCGA-UF-A7JV	62	Female	2.96	Dead	G2	Stage IV	T4	N2	M0
TCGA-CR-7371	45	Female	3.09	Dead	G2	Stage III	T3	N0	M0
TCGA-T3-A92N	79	Male	3.12	Dead	G3	Stage IV	T1	N1	M1
TCGA-CR-7370	72	Female	3.45	Alive	G2	Stage II	T2	N0	M0
TCGA-CV-A6JU	61	Female	3.61	Alive	G2	Stage IV	T4	N0	M0
TCGA-CN-6995	78	Male	3.68	Dead	G2	Stage IV	T4	N1	M0
TCGA-CQ-5334	87	Male	4.24	Dead	G2	Stage IV	T4	N2	M0
TCGA-HD-A634	56	Male	4.27	Dead	G3	Stage III	T3	N1	M0
TCGA-BB-4227	66	Male	4.4	Alive	G2	Stage IV	T4	N2	M0
TCGA-CN-4726	68	Male	4.66	Dead	G2	Stage IV	T3	N2	M0
TCGA-CV-6938	87	Male	4.73	Dead	G1	Stage II	T2	N0	M0
TCGA-BB-4225	73	Male	4.8	Alive	G3	Stage IV	T3	N2	M0
TCGA-CV-6936	68	Male	5.45	Dead	G2	Stage IV	T4	N2	M0
TCGA-QK-A8Z8	60	Female	5.62	Dead	G2	Stage IV	T3	N1	M1
TCGA-CV-A6JD	82	Female	5.98	Dead	G3	Stage IV	T4	N0	M0
TCGA-CV-6952	65	Female	6.08	Dead	G1	Stage III	T3	N0	M0
TCGA-CV-A45X	47	Male	6.5	Dead	G2	Stage IV	T4	N1	M0
TCGA-CN-6020	58	Male	6.73	Dead	G2	Stage IV	T3	N2	M0
TCGA-CV-5978	53	Female	7.06	Dead	G2	Stage IV	T4	N3	M0
TCGA-BA-A6DB	24	Female	7.1	Alive	G1	Stage II	T2	N0	M0
TCGA-CV-7434	64	Male	7.16	Dead	G2	Stage III	T3	N0	M0
TCGA-QK-A6IG	69	Male	7.29	Dead	G2	Stage II	T2	N0	M0
TCGA-CR-6487	50	Male	7.69	Alive	G3	Stage II	T2	N0	M0
TCGA-MT-A51X	30	Male	7.95	Alive	G1	Stage IV	T1	N2	M0
TCGA-CV-7099	85	Female	7.98	Dead	G2	Stage II	T2	N0	M0
TCGA-CN-5363	48	Male	8.31	Dead	G3	Stage IV	T4	N3	M0
TCGA-QK-AA3K	60	Male	8.31	Alive	G2	Stage IV	T3	N2	MX
TCGA-CN-5358	60	Male	8.57	Dead	G2	Stage III	T2	N1	M0
TCGA-CV-7100	66	Male	9	Dead	G3	Stage II	T2	N0	M0
TCGA-CN-6021	63	Female	9.07	Dead	G2	Stage III	T3	N0	M0
TCGA-BA-4078	83	Male	9.07	Dead	G2	Stage IV	T2	N2	M0
TCGA-BB-4224	52	Male	9.13	Alive	G2	Stage III	T3	N0	M0
TCGA-CR-7377	58	Male	9.17	Dead	G3	Stage IV	T4	N1	M0
TCGA-CR-6493	69	Male	9.26	Dead	G2	Stage IV	T3	N2	M0
TCGA-BA-4075	49	Male	9.3	Dead	G2	Stage IV	T4	N1	M0
TCGA-QK-A6II	52	Male	9.33	Dead	G2	Stage III	T3	N0	M0
TCGA-CV-6935	67	Male	9.69	Dead	G3	Stage III	T3	N0	M0
TCGA-CR-6481	47	Male	10.22	Alive	G2	Stage IV	T2	N2	M0
TCGA-CQ-5332	87	Male	10.41	Dead	G2	Stage III	T3	N0	M0
TCGA-CV-A6K2	79	Male	10.41	Dead	G1	Stage II	T2	N0	M0
TCGA-CN-6988	47	Male	10.45	Alive	G3	Stage IV	T4	N2	M0
TCGA-CX-7085	77	Female	10.55	Alive	G2	Stage III	T3	N0	M0
TCGA-BB-A5HY	64	Male	10.55	Dead	G3	Stage IV	T3	N2	M0
TCGA-CV-7180	34	Male	10.74	Dead	G2	Stage II	T2	N0	M0
TCGA-KU-A6H8	41	Male	10.74	Dead	G3	Stage I	T1	N0	M0
TCGA-P3-A5QF	49	Male	10.84	Dead	G2	Stage IV	T4	N2	M0
TCGA-CN-6024	66	Male	11.07	Dead	G2	Stage IV	T4	N2	M0
TCGA-CQ-5333	74	Male	11.2	Dead	G3	Stage I	T1	N0	M0
TCGA-CV-6941	51	Male	11.24	Dead	G2	Stage III	T3	N0	M0
TCGA-CN-5367	60	Female	11.56	Dead	G2	Stage IV	T4	N0	M0
TCGA-CQ-A4C7	88	Male	11.6	Dead	G3	Stage II	T2	N0	M0
TCGA-CR-5247	48	Male	11.76	Alive	G2	Stage III	T3	N1	M0
TCGA-CN-5366	51	Male	11.83	Dead	G2	Stage IV	T4	N2	M0
TCGA-CV-7253	58	Male	11.86	Dead	G2	Stage II	T2	N0	M0
TCGA-CR-6480	53	Male	11.89	Alive	G2	Stage IV	T2	N2	M0
TCGA-CV-6945	41	Male	12.02	Dead	G2	Stage IV	T4	N2	M0
TCGA-CN-A641	47	Male	12.06	Alive	G2	Stage IV	T4	N2	M0
TCGA-D6-A4ZB	61	Male	12.35	Alive	G2	Stage III	T3	N0	M0
TCGA-CR-6488	68	Female	12.45	Alive	G2	Stage II	T2	N0	M0
TCGA-CQ-A4CH	58	Male	12.45	Dead	G2	Stage IV	T4	N2	M0
TCGA-CN-5369	90	Female	12.48	Dead	G3	Stage IV	T4	N1	M0
TCGA-HD-8634	51	Female	12.65	Dead	G2	Stage I	T1	NX	M0
TCGA-CV-7097	53	Male	12.65	Dead	G3	Stage III	T3	N0	M0
TCGA-D6-A6ES	50	Male	12.78	Alive	G2	Stage IV	T4	N1	M0
TCGA-CN-4729	73	Male	12.88	Alive	G2	Stage IV	T4	N0	M0
TCGA-CR-7389	55	Male	12.88	Alive	G2	Stage III	T2	N1	M0
TCGA-QK-A8Z7	59	Male	12.88	Alive	NA	Stage IV	T4	N2	M0
TCGA-BB-A6UM	52	Male	12.91	Alive	GX	Stage III	T2	N2	MX
TCGA-CN-4736	70	Female	12.98	Dead	G2	Stage II	T2	N0	M0
TCGA-D6-6515	82	Female	13.24	Dead	G3	Stage II	T2	N0	M0
TCGA-H7-7774	75	Female	13.37	Alive	G2	Stage III	T3	N0	M0
TCGA-BA-A6DJ	62	Male	13.37	Dead	G2	Stage IV	T4	N2	M0
TCGA-T3-A92M	52	Male	13.7	Alive	G2	Stage IV	T4	N2	M0
TCGA-UF-A7JK	59	Male	13.93	Dead	G2	Stage IV	T4	N0	M0
TCGA-BA-A6DE	70	Female	14.45	Alive	G2	Stage III	T3	N0	M0
TCGA-WA-A7H4	69	Male	14.55	Alive	G3	Stage II	T2	N0	M0
TCGA-HD-8224	63	Male	14.65	Dead	G3	Stage III	T3	N0	M0
TCGA-QK-A8Z9	56	Male	14.75	Dead	G2	Stage IV	T4	N2	M0
TCGA-BA-6870	60	Female	14.82	Dead	G2	Stage IV	T3	N2	M1
TCGA-CV-7424	67	Male	14.88	Dead	G2	Stage IV	T4	N2	M0
TCGA-H7-8501	54	Male	15.14	Alive	GX	Stage IV	T4	N2	M0
TCGA-BA-4074	69	Male	15.18	Dead	G3	Stage IV	T3	N2	M0
TCGA-CV-A468	42	Male	15.24	Dead	G2	Stage III	T3	N2	M0
TCGA-QK-AA3J	69	Male	15.31	Alive	G3	Stage I	T1	N0	M0
TCGA-MT-A7BN	74	Male	15.41	Alive	G3	Stage IV	T2	N2	M0
TCGA-P3-A6T7	55	Male	16	Dead	G2	Stage III	T3	N1	M0
TCGA-MZ-A6I9	68	Male	16.06	Dead	G2	Stage IV	T4	N2	M0
TCGA-CV-7437	77	Male	16.62	Dead	GX	Stage II	T2	N0	M0
TCGA-CR-6477	56	Female	16.89	Alive	G2	Stage IV	T3	N2	M0
TCGA-RS-A6TP	58	Male	16.95	Alive	G3	Stage II	T2	N0	M0
TCGA-BA-5555	54	Male	17.08	Alive	G2	Stage IV	T2	N2	M0
TCGA-CR-7383	79	Female	17.12	Dead	G2	Stage I	T1	N0	M0
TCGA-CV-7248	63	Female	17.12	Dead	G2	Stage IV	T4	N2	M0
TCGA-CV-5431	73	Male	17.15	Dead	G3	Stage IV	T3	N2	M0
TCGA-CN-A49A	60	Male	17.28	Dead	G2	Stage IV	T4	N0	M0
TCGA-CN-6996	58	Female	17.41	Dead	G2	Stage IV	T3	N2	M0
TCGA-D6-A4Z9	59	Male	17.71	Alive	G2	Stage IV	T2	N2	M0
TCGA-F7-A620	47	Male	17.84	Alive	G1	NA	TX	NX	MX
TCGA-UF-A7JC	42	Male	17.94	Dead	G1	Stage III	T3	N1	M0
TCGA-CR-6474	51	Male	18.53	Dead	G2	Stage IV	T3	N2	M0
TCGA-CX-7086	53	Male	18.82	Alive	G2	Stage IV	T4	N2	M0
TCGA-CV-7247	55	Male	18.96	Dead	G2	Stage II	T2	N0	M0
TCGA-P3-A6T3	49	Male	18.96	Dead	G2	Stage IV	T4	N1	M0
TCGA-P3-A6T0	47	Female	18.99	Alive	G2	Stage IV	T4	N2	M0
TCGA-CV-5436	65	Male	19.19	Dead	G2	Stage IV	T3	N2	M0
TCGA-KU-A6H7	55	Female	19.25	Alive	G2	Stage IV	T2	N2	M0
TCGA-QK-A6VC	62	Female	19.71	Alive	G2	Stage IV	T4	N2	M0
TCGA-CR-7380	58	Male	19.91	Dead	G2	Stage III	T3	N0	M0
TCGA-F7-A50G	66	Male	20.24	Alive	G1	NA	NA	NA	NA
TCGA-TN-A7HL	59	Male	20.34	Alive	G2	Stage IV	T4	NX	M0
TCGA-BA-A4IH	57	Male	20.43	Alive	G3	Stage IV	T2	N2	M0
TCGA-BA-5557	41	Female	20.47	Alive	G2	Stage IV	T2	N2	M0
TCGA-CV-6937	71	Male	20.5	Dead	G2	Stage II	T2	N0	M0
TCGA-CN-4737	19	Male	20.53	Alive	G2	Stage II	T2	N0	M0
TCGA-WA-A7GZ	58	Male	20.53	Dead	G2	Stage II	T2	N0	M0
TCGA-UF-A7JO	79	Female	20.73	Dead	G2	Stage IV	T4	N0	M0
TCGA-H7-A76A	57	Male	20.93	Alive	G2	Stage IV	T2	N2	M0
TCGA-CV-A45P	82	Female	20.99	Alive	G2	Stage II	T2	N0	M0
TCGA-QK-A6VB	66	Male	21.06	Alive	G2	Stage IV	T4	N0	M0
TCGA-CN-A49C	67	Male	21.19	Alive	GX	Stage IV	T4	N2	M0
TCGA-QK-A6IH	65	Female	21.45	Alive	G2	Stage IV	T4	N1	M0
TCGA-CQ-5325	65	Male	21.48	Dead	G2	Stage I	T1	N0	M0
TCGA-CV-7177	82	Female	21.78	Dead	G2	Stage I	T1	N0	M0
TCGA-CV-6939	60	Male	21.88	Dead	G3	Stage IV	T4	N1	M0
TCGA-HD-7831	74	Male	21.91	Alive	G2	Stage III	T3	N0	M0
TCGA-CV-7440	38	Male	22.17	Dead	GX	Stage II	T2	N0	M0
TCGA-D6-A6EN	71	Male	22.57	Alive	G3	Stage III	T3	N0	M0
TCGA-HD-8635	61	Female	22.83	Alive	G2	Stage III	T1	N1	M0
TCGA-CV-7415	60	Male	22.83	Dead	G2	Stage III	T3	N0	M0
TCGA-CQ-A4C9	56	Male	23.23	Alive	G2	NA	TX	NX	MX
TCGA-BA-5151	72	Male	23.72	Alive	G1	Stage IV	T4	N0	M0
TCGA-BA-5556	58	Female	23.82	Alive	G3	Stage II	T2	N0	M0
TCGA-CN-6013	56	Male	23.88	Dead	G3	Stage IV	T4	N2	M0
TCGA-UF-A7JD	71	Male	24.28	Dead	G3	Stage IV	T4	N0	M0
TCGA-CN-A6V3	61	Male	24.38	Alive	G3	Stage IV	T3	N2	M0
TCGA-CR-7397	44	Male	24.77	Alive	G2	Stage IV	T3	N2	M0
TCGA-CR-7372	45	Male	24.93	Alive	G1	Stage II	T2	N0	M0
TCGA-F7-A61V	54	Male	24.93	Alive	G1	NA	TX	NX	MX
TCGA-CV-7416	29	Female	25.07	Dead	GX	Stage IV	T4	N0	M0
TCGA-D6-8569	52	Male	25.3	Alive	G2	Stage II	T2	N0	M0
TCGA-CV-7418	62	Male	25.92	Dead	G2	Stage IV	T4	N0	M0
TCGA-CR-5250	71	Male	26.25	Alive	G3	Stage II	T2	N0	M0
TCGA-CN-4730	62	Male	26.84	Alive	G2	Stage IV	T4	N2	M0
TCGA-QK-A6V9	56	Male	27.37	Alive	G2	Stage II	T2	N0	M0
TCGA-HD-7832	52	Male	27.46	Alive	G2	Stage IV	T4	N2	M0
TCGA-CN-4740	79	Female	27.56	Dead	G2	Stage IV	T4	N0	M0
TCGA-CN-6017	55	Male	28.02	Dead	G2	Stage III	T2	N1	M0
TCGA-CV-6960	49	Male	28.32	Dead	G3	Stage III	T3	N0	M0
TCGA-D6-A6EK	67	Male	28.75	Alive	G1	Stage IV	T4	N1	M0
TCGA-CQ-A4CB	59	Male	29.34	Alive	G2	Stage II	T2	N0	M0
TCGA-BA-A4IF	59	Male	29.4	Alive	G2	Stage IV	T4	N0	M0
TCGA-CQ-A4CE	76	Female	29.47	Alive	G2	Stage II	T2	N0	M0
TCGA-CN-A49B	71	Male	29.7	Alive	G3	Stage III	T3	N1	M0
TCGA-CR-7391	36	Female	29.99	Alive	G1	Stage I	T1	N0	M0
TCGA-BA-A4II	46	Male	30.16	Alive	G1	Stage I	T1	N0	M0
TCGA-DQ-5629	64	Male	30.91	Dead	G2	Stage IV	T4	N2	M0
TCGA-F7-A50J	67	Female	31.11	Alive	G2	NA	NA	NA	NA
TCGA-T2-A6X2	82	Male	32.42	Alive	G1	Stage III	T3	N0	M0
TCGA-UF-A7JT	72	Female	32.62	Dead	G3	Stage IV	T4	N0	M0
TCGA-CR-7385	42	Male	32.75	Alive	G2	Stage IV	T2	N2	M0
TCGA-IQ-A61J	54	Male	33.54	Alive	G1	Stage IV	T2	N2	M0
TCGA-CR-6472	59	Male	34.49	Alive	G3	Stage IV	T2	N3	M0
TCGA-CN-6992	61	Male	35.02	Alive	G2	Stage IV	T4	N1	M0
TCGA-CV-A6JE	78	Male	35.32	Alive	G2	Stage II	T2	N0	M0
TCGA-CR-7401	64	Male	35.38	Alive	G2	Stage I	T1	N0	M0
TCGA-CV-A45U	59	Male	35.45	Dead	G1	Stage IV	T4	N0	M0
TCGA-CV-7407	67	Female	35.51	Dead	G2	Stage II	T2	N0	M0
TCGA-F7-7848	47	Male	37.16	Alive	G2	Stage IV	T4	N1	M0
TCGA-BA-4077	45	Female	37.25	Dead	G2	Stage IV	T4	N3	M0
TCGA-IQ-A61E	55	Female	37.68	Alive	G2	Stage III	T3	N0	MX
TCGA-CN-4725	60	Male	38.01	Alive	G2	Stage II	T2	N0	M0
TCGA-CN-6994	67	Male	38.86	Alive	G2	Stage IV	T4	N2	M0
TCGA-CR-7368	54	Male	40.9	Alive	G2	Stage IV	T4	N0	M0
TCGA-BA-7269	61	Male	41.82	Alive	G1	Stage III	T2	N1	M0
TCGA-CQ-7069	77	Female	41.85	Alive	G2	Stage II	T2	N0	M0
TCGA-BA-5152	56	Male	42.31	Alive	G2	Stage IV	T4	N0	M0
TCGA-CV-6948	79	Female	42.35	Dead	G2	Stage IV	T4	N0	M0
TCGA-CQ-7068	80	Female	43	Alive	G2	Stage II	T2	N0	M0
TCGA-CV-5979	26	Male	43.2	Alive	G2	Stage III	T3	N1	M0
TCGA-CR-7394	70	Male	44.22	Alive	G2	Stage IV	T3	N2	M0
TCGA-UF-A7J9	75	Male	44.61	Alive	G2	Stage IV	T4	N0	M0
TCGA-CV-A45W	75	Male	45.93	Dead	G2	Stage III	T3	N0	M0
TCGA-CQ-5331	73	Female	45.96	Alive	G2	Stage IV	T4	N0	M0
TCGA-CQ-6223	69	Male	46.91	Alive	G2	Stage IV	T4	N0	M0
TCGA-CR-7386	69	Male	46.98	Alive	G1	Stage IV	T4	N1	M0
TCGA-P3-A6SX	67	Male	46.98	Dead	G2	Stage IV	T4	N0	M0
TCGA-CR-7364	66	Male	47.14	Alive	G2	Stage III	T3	N0	M0
TCGA-CN-6016	64	Male	47.4	Alive	G2	Stage IV	T4	N1	M0
TCGA-CV-7254	55	Male	47.93	Dead	G3	Stage II	T2	N0	M0
TCGA-CN-6012	66	Male	47.96	Alive	G2	Stage III	T3	N1	M0
TCGA-UF-A71D	54	Female	48	Alive	G2	Stage IV	T4	N1	M0
TCGA-CQ-5323	82	Male	48.16	Alive	G2	Stage III	T3	N0	M0
TCGA-CR-7404	53	Male	48.36	Alive	G2	Stage IV	T3	N2	M0
TCGA-CV-5976	50	Male	48.55	Alive	G2	Stage III	T3	N1	M0
TCGA-CN-4722	61	Female	48.72	Alive	G1	Stage II	T2	N0	M0
TCGA-UF-A71E	63	Male	49.41	Dead	G3	Stage IV	T4	N0	M0
TCGA-UF-A71B	50	Male	49.47	Alive	G2	Stage IV	T4	N1	M0
TCGA-CR-7390	67	Male	49.54	Alive	G2	Stage III	T3	N0	M0
TCGA-CV-7261	57	Male	49.67	Alive	G2	Stage III	T3	N0	M0
TCGA-CR-6470	38	Male	49.97	Alive	G2	Stage IV	T1	N2	M0
TCGA-CN-6010	53	Male	50.03	Alive	G2	Stage IV	T4	N0	M0
TCGA-CN-4733	61	Male	52.1	Alive	G3	Stage I	T1	N0	M0
TCGA-CQ-5327	61	Female	54.53	Alive	G2	Stage IV	T3	N2	M0
TCGA-CV-6003	50	Female	54.7	Alive	G2	Stage II	T2	N0	M0
TCGA-CV-7428	47	Male	54.89	Dead	G2	Stage IV	T4	N2	M0
TCGA-UF-A7JF	80	Male	55.39	Alive	G2	Stage IV	T4	N2	M0
TCGA-CN-4734	70	Male	55.52	Alive	G2	Stage II	T2	N0	M0
TCGA-CN-4723	67	Male	55.81	Alive	G2	Stage IV	T4	N0	M0
TCGA-CV-7425	77	Female	56.44	Dead	G1	Stage III	T3	N0	M0
TCGA-CN-4728	56	Male	56.64	Alive	G2	Stage IV	T2	N2	M0
TCGA-CN-4735	52	Male	57.06	Alive	G3	Stage IV	T3	N2	M0
TCGA-DQ-5624	43	Female	58.41	Alive	G2	Stage IV	T4	N1	M0
TCGA-CQ-5330	69	Female	62.32	Alive	G3	Stage III	T3	N1	M0
TCGA-CV-6436	62	Male	62.39	Alive	G1	Stage III	T3	N0	M0
TCGA-UF-A718	62	Male	64.75	Alive	G2	Stage IV	T4	N0	M0
TCGA-CV-7089	74	Male	64.78	Dead	G2	Stage IV	T4	N2	M0
TCGA-CQ-6222	63	Male	66.23	Alive	G2	Stage IV	T3	N2	M0
TCGA-CV-A461	65	Male	67.81	Dead	G2	Stage III	T3	N0	M0
TCGA-BA-5559	71	Male	68.43	Dead	G3	Stage IV	T3	N2	M0
TCGA-CN-5361	80	Male	69.65	Dead	G2	NA	TX	NX	NA
TCGA-CQ-7063	59	Female	70.07	Alive	G1	NA	NA	NA	NA
TCGA-CQ-5329	46	Female	70.4	Alive	G2	Stage III	T3	N1	M0
TCGA-BB-8596	69	Female	70.99	Alive	G3	Stage IV	T4	N1	M0
TCGA-CN-4741	75	Male	73.55	Alive	G2	Stage IV	T4	N0	M0
TCGA-UF-A7JA	66	Female	74.41	Alive	G2	Stage IV	T4	N1	M0
TCGA-P3-A6T2	45	Male	75.49	Alive	G2	Stage II	T2	N0	M0
TCGA-CV-7235	67	Male	77.1	Alive	G3	Stage III	T3	N0	M0
TCGA-CV-5444	64	Male	80.06	Alive	G3	Stage IV	T4	N0	M0
TCGA-CV-5973	62	Female	86.76	Alive	G3	Stage III	T3	N0	M0
TCGA-CV-A45Y	61	Male	88.8	Dead	G3	Stage IV	T4	N0	M0
TCGA-CV-7411	64	Female	89.26	Dead	G1	Stage IV	T4	N0	M0
TCGA-CV-5443	63	Male	91.46	Alive	G3	Stage III	T3	N1	M0
TCGA-CV-5441	58	Male	94.81	Alive	G3	Stage IV	T4	N1	M0
TCGA-CV-7250	64	Male	95.27	Dead	G1	Stage III	T3	N0	M0
TCGA-CV-7423	65	Male	100.49	Dead	G1	Stage II	T2	N0	M0
TCGA-CV-7091	54	Male	111.07	Alive	G3	Stage I	T1	N0	M0
TCGA-CV-7427	73	Female	156.37	Dead	G1	Stage II	T2	N0	M0
TCGA-CV-A45T	64	Female	159.53	Dead	G3	Stage II	T2	N0	M0
TCGA-CV-A45R	46	Male	180.03	Alive	G1	Stage III	T3	N1	M0
TCGA-CV-7410	61	Male	210.81	Dead	GX	Stage II	T2	N0	M0
